# Supplementary material
Source: PubMed Central journal article supplement (PMC6731175)
Supplement: mmc1.pdf [file mmc1.pdf]

## **Supplemental Information**

### **PTB-AS, a Novel Natural Antisense Transcript, Promotes Glioma Progression by Improving PTBP1 mRNA Stability with SND1**

**Liyuan Zhu, Qunfang Wei, Yingjiao Qi, Xiangbin Ruan, Fan Wu, Liang Li, Junjie Zhou, Wei Liu, Tao Jiang, Jing Zhang, Bin Yin, Jiangang Yuan, Boqin Qiang, Wei Han, and Xiaozhong Peng**

## Supplemental Figures and Figure Legends

### Figure S1

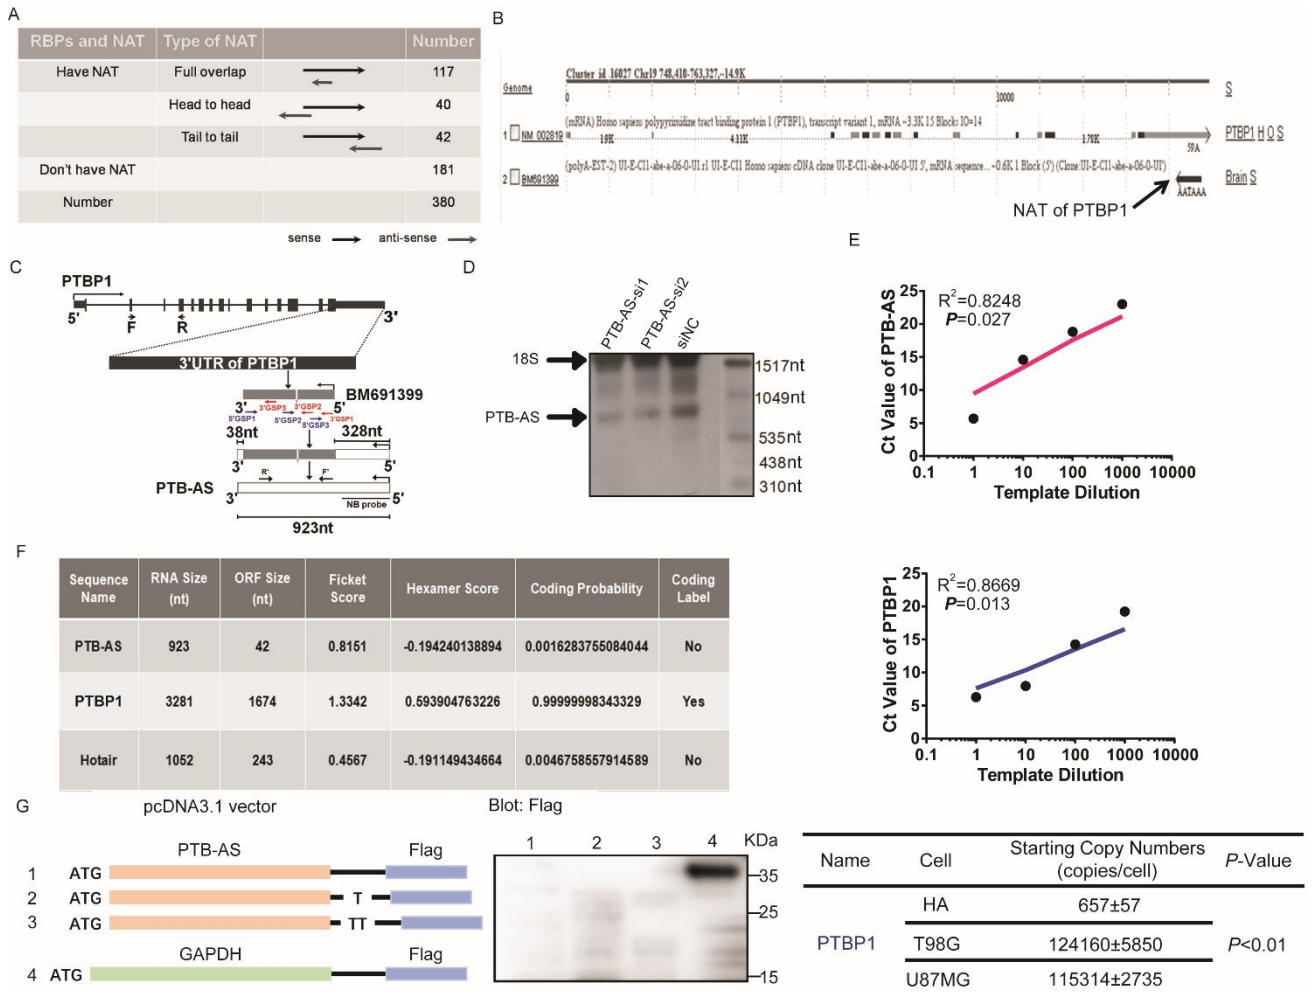

### Suppl Figure S1: The overview of screening results for RBPs associated NATs and identification of PTBP1 NAT.

**A.** The statistics of the screening results for RBPs and the subtype of the NATs.

**B.** NAT of PTBP1 was located in the 3'UTR of PTBP1 and owns the poly (A) tail. The black stick which had been directed by arrow indicated the NAT of PTBP1.

**C.** U87MG cell was transfected with PTB-AS-siRNA or siNC and the total RNA was extracted for northern blot. The amount of total RNA each lane was equivalent. The sharp band directed by the subjacent arrow was PTB-AS.

**D.** The relative genomic locus of PTB-AS and PTBP1. The raw transcript of PTB-AS, BM691399, was totally overlapped by PTBP1-3'UTR. By using 5' & 3' RACE, the full length of PTB-AS was identified as 923nt. NB probe indicated the real position of probe for Northern Blot.

**E.** The starting copy number was detected and calculated to quantify the expression of PTBP1 in HA, T98G or U87MG cell lines using absolute Quantification PCR. The standard curve was made according to the starting cycle value of PTB-AS and PTBP1, respectively.

**F.** Coding potential prediction for PTB-AS using CPC and CPAT software. PTBP1 and HOTAIR acted as coding and non-coding transcript positive controls, respectively.

**G.** Full-length PTB-AS was cloned into pcDNA3.1 (with N-terminal start codon ATG and C-terminal Flag tag) in all three coding patterns and subsequently transfected into HEK293T cells separately. GAPDH (the mRNA length was close to PTB-AS) with Flag tag severs as a positive control. Western blot was performed to detect the Flag-tagged protein after 48 hours. Data are representative of three independent experiments.

**Figure S2**

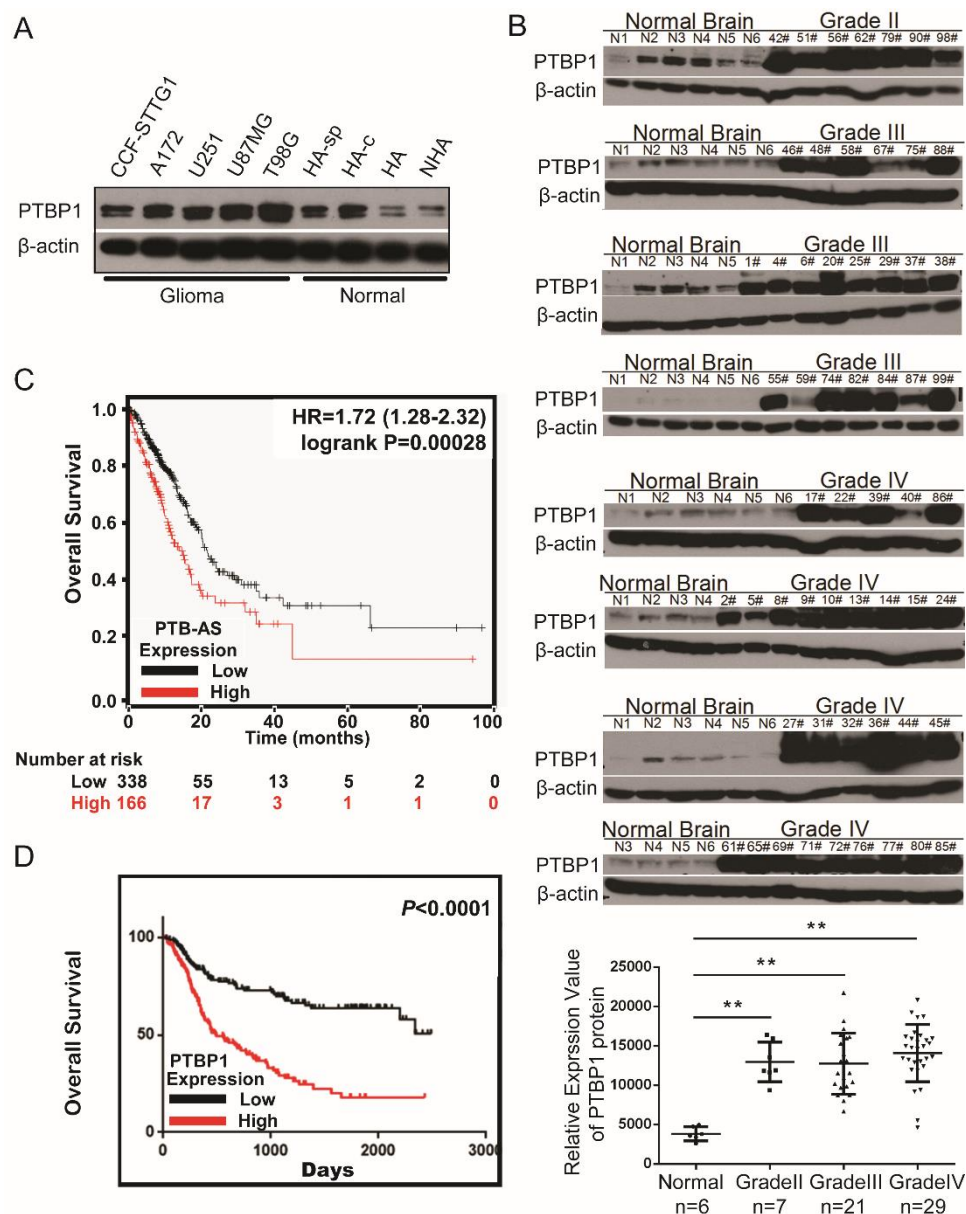

**Suppl Figure S2: The raw data of PTBP1 which expressed and functioned in glioma.**

**A.** Western blotting result showed the expression level of PTBP1 protein in 5 glioma cell lines and 4 human astrocyte cell lines.

**B.** Relative expression level of PTBP1 protein in 6 control brain tissues, representative 7 grade II, 21 grade III, and 29 grade IV glioma tissues by western blotting ( $\beta$ -actin was used as the internal parameters) and analysis the value of grey scale scanning the corresponding bands after western blotting. The protein expression levels of PTBP1 are relatively expressed as the mean  $\pm$  SD,  $n = 3$ .  $*P < 0.05$ ;  $**P < 0.01$  (Student's t test).

**C.** The Kaplan–Meier curve analysis on the impact of PTB-AS expression on overall survival.  $P$  value was calculated by Log Rank test.

**D.** The differential overall survival curve of high or low PTBP1 expressed patients. Kaplan–Meier curve analysis on the impact of PTBP1 expression.  $P$  value was calculated by Log Rank test.

Figure S3

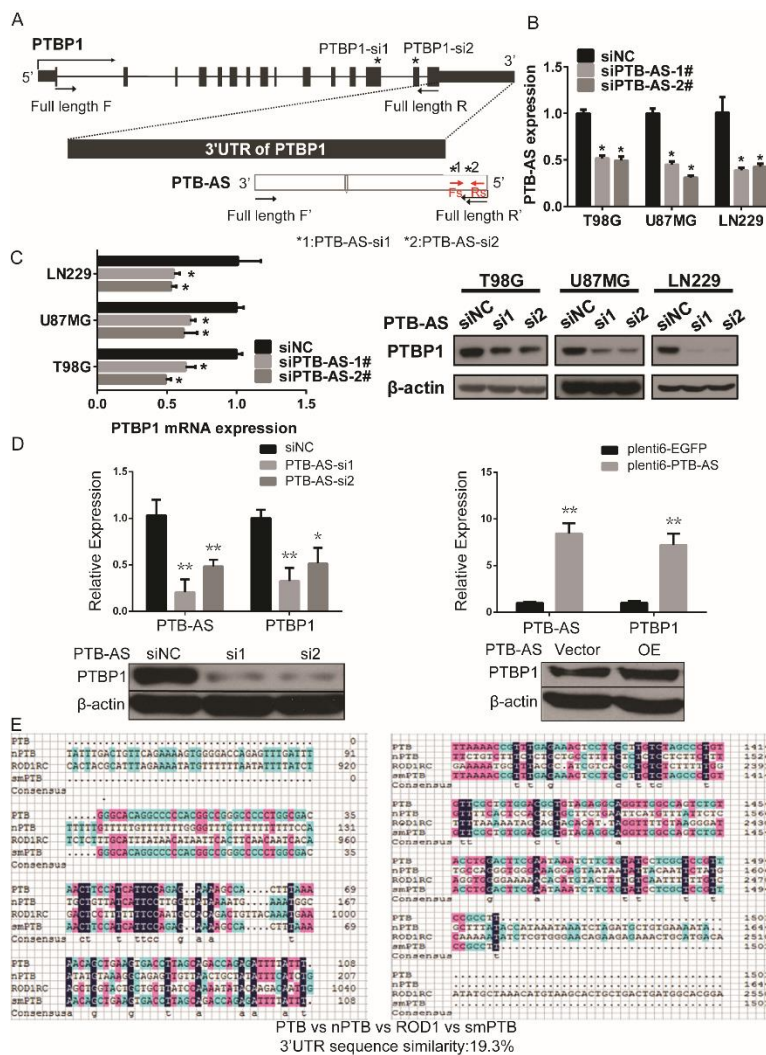

**Suppl Figure S3: The target site of stealth siRNAs of PTB-AS and PTBP1.**

**A.** The detail graph which shown the target site (marked \*) of stealth siRNAs of PTB-AS and PTBP1, as well as the position of primers (Full length F&R, F'&R') for PTB-AS or PTBP1 overexpression. The specific primers Fs&Rs of PTB-AS were used for qRT-PCR. The target of siRNAs for PTB-AS located in the non-overlapped area with PTBP1-3'UTR in order to avoid off-target effect.

**B&C.** Changes in PTB-AS level alter PTBP1 mRNA and protein levels. T98G, U87MG or LN229 cells were infected with two different siRNAs (PTB-AS si1 or PTB-AS si2) to knock down. PTB-AS (using Fs&Rs primer pair) and PTBP1 mRNA level were measured by qRT-PCR. PTBP1 protein level was measured by western blot. n=3. \*P<0.05 (Student's t test).

**D.** A172 cells were transfected with two different PTB-AS siRNAs, siNC or PTB-AS-plenti6 plasmid, plenti6-EGFP, separately. Then total RNA of differential treatment cells was extracted for reverse transcription. Following qRT-PCR and western blotting were performed to test the expression changes of PTBP1 in RNA and protein level after knocking down PTB-AS. The expression of PTBP1 in RNA level is relatively showed as the mean ± SD, n = 3. \*P< 0.05; \*\*P<0.01 (Student's t test).

**E.** Alignment of 3'UTR of PTBP1 family members using DNAMAN. The bases in dark blue indicated the absolutely similar sequence of the four members, the pink one indicated three members had this base in the same position, and the light green one indicated that only two members share the same base.

**Figure S4**

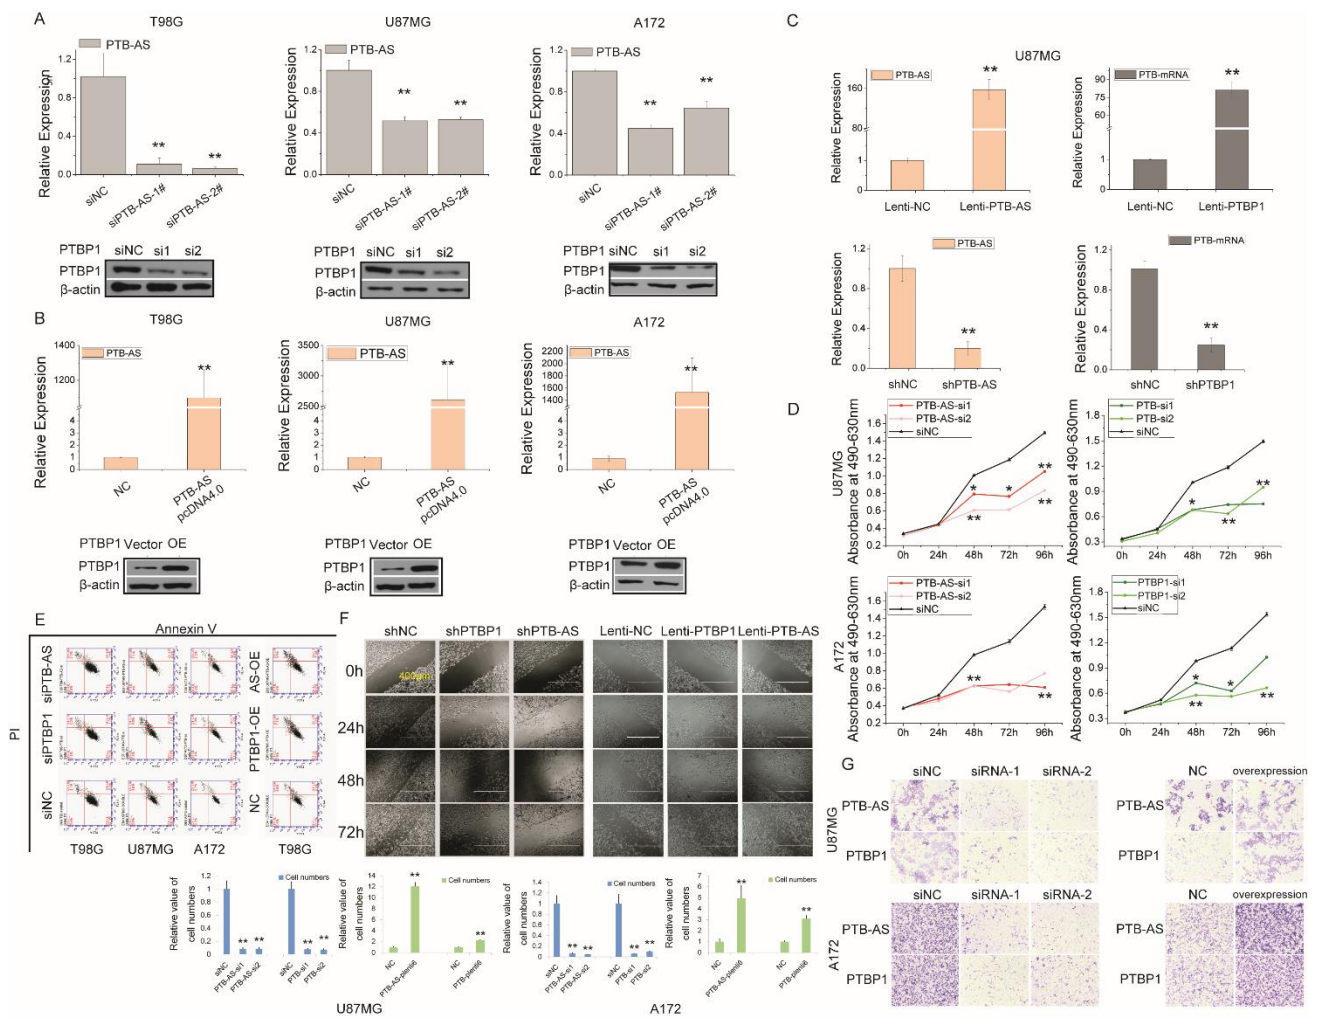

**Suppl Figure S4: The biological function of PTB-AS and PTBP1 in glioma**

**A, B and C.** Quantitative real-time PCR and western blotting were performed to identify the efficiency of PTB-AS and PTBP1 knocking down or overexpressing in T98G, U87MG and A172 glioma cell lines. The RNA levels of PTB-AS and PTBP1 are relatively expressed as the mean  $\pm$  SD,  $n = 3$ . \* $P < 0.05$ ; \*\* $P < 0.01$ ; \*\*\* $P < 0.001$  (Student's t test).

**D.** MTS assays shown the growth curve of U87MG and A172 cell lines after transfecting siRNAs against PTB-AS or PTBP1, following individually test the absorbance in 490nm and 630nm. Results are expressed as mean  $\pm$  SD,  $n = 4$ . \* $P < 0.05$ ; \*\* $P < 0.01$  (Student's t test).

**E.** Annexin V-FITC and PI co-staining to identify the apoptosis of glioma cells (T98G, U87MG and A172) after transfected with the knocking down or overexpressing materials of PTB-AS or PTBP1, respectively.

**F.** The wound-healing images, which represents the relative area of the remaining open wound calculated in relation to that at time 0 h after PTB-AS/PTBP1 knockdown or overexpression.

**G.** Transwell migration assays of U87MG and A172 glioma cell line transfected with siRNAs or plasmids for PTB-AS and PTBP1 knocking down or overexpressing, respectively. Fixation and staining were performed after transfection for 72h. The results are representative of at least three independent experiments. Graphs indicate the average number of cells per field of the indicated cell lines in migration assays. Results show the mean  $\pm$  SD, \* $P < 0.05$ , \*\* $P < 0.01$  (Student's t test).

**Figure S5**

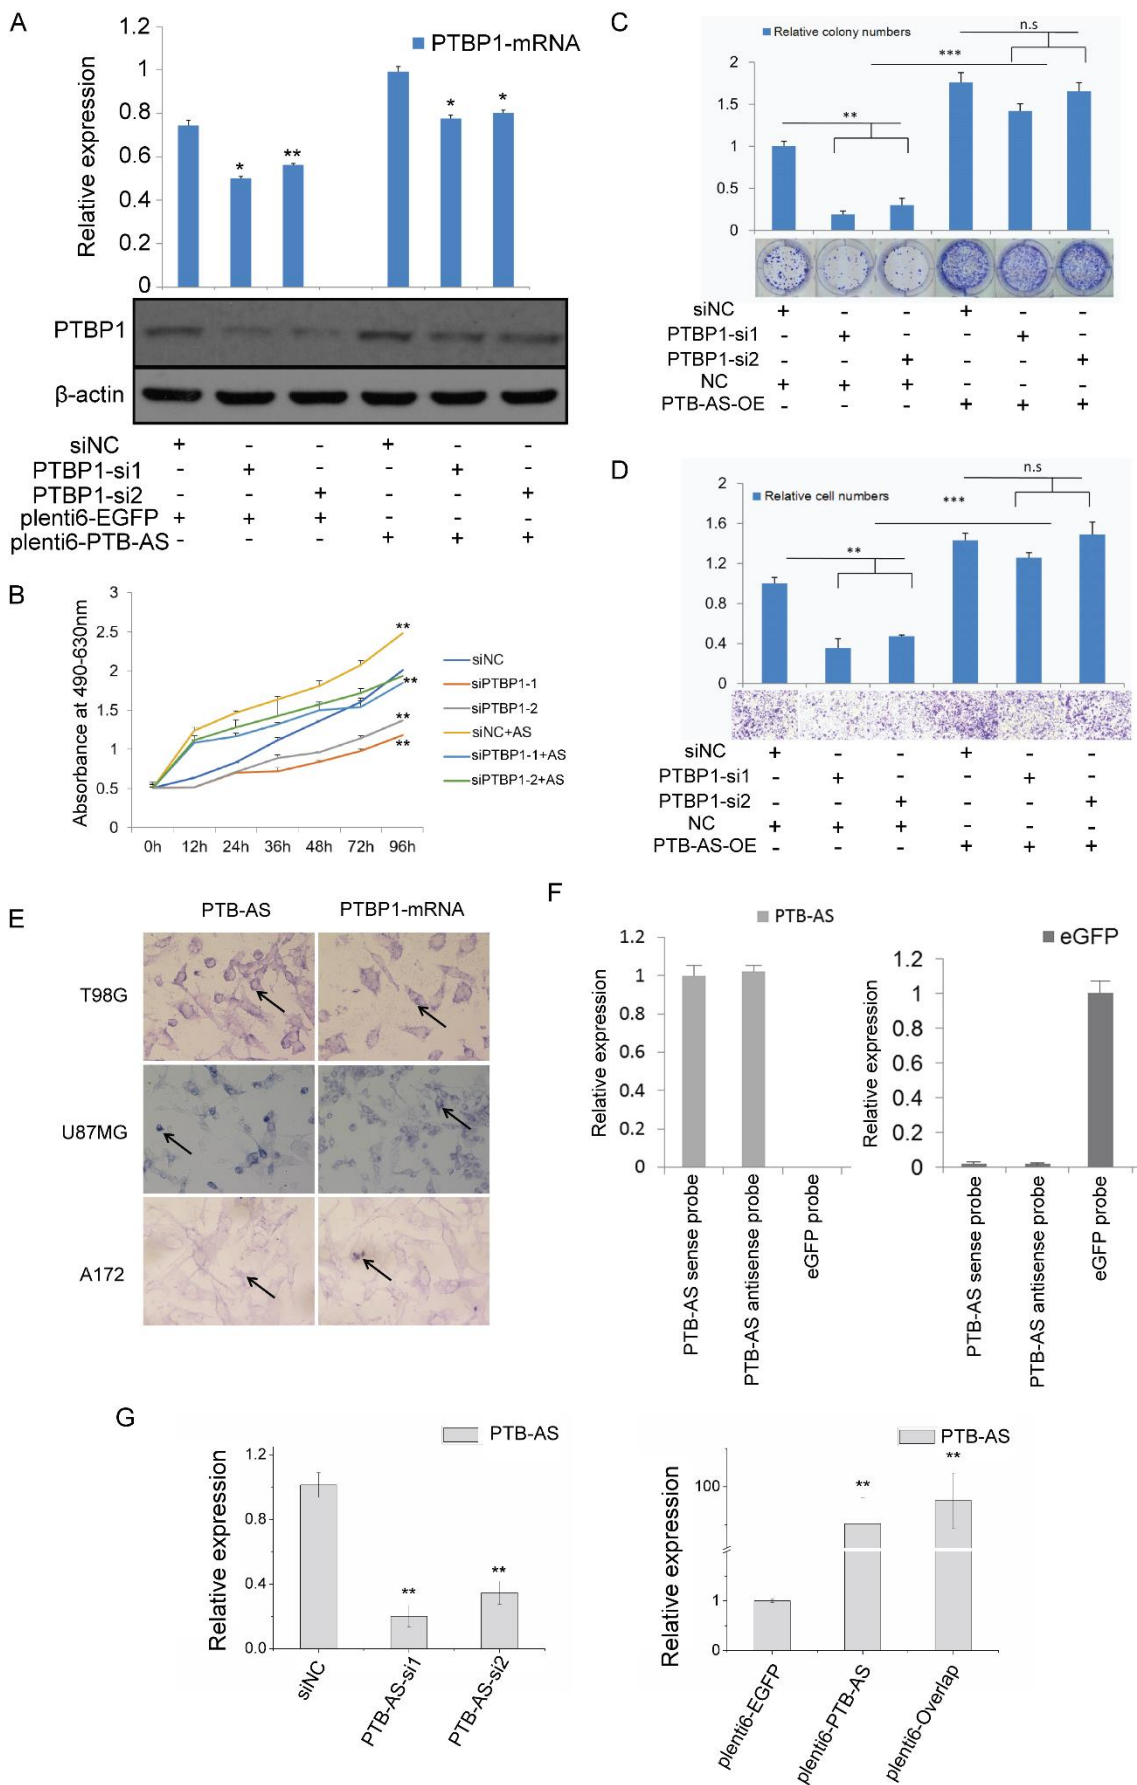

**Suppl Figure S5: PTB-AS could rescue the down regulation of PTBP1 through binding to PTBP1-3'UTR in cytoplasm and influenced PTBP1 mRNA stability.**

**A.** The glioma cell U87MG was co-transfected with PTBP1-siRNA and PTB-AS-OE (plenti6-PTB-AS) in order to perform the rescue experiment. SiNC or NC (plenti6-EGFP), as the negative control, was used to make permutation and combination with PTBP1-siRNA or PTB-AS-OE. Following qRT-PCR and western blotting were operated to test the expression changes of PTBP1 in RNA and protein level. The expression of PTBP1 in RNA level is relatively showed as the mean  $\pm$  SD, n = 3. \* $P$  < 0.05; \*\* $P$  < 0.01 (Student's t test).

**B, C and D.** The glioma cell U87MG was co-transfected with PTBP1-siRNA and PTB-AS-OE (plenti6-PTB-AS) in order to perform the rescue experiment. SiNC or NC (plenti6-EGFP), as the negative control, was used to make permutation and combination with PTBP1-siRNA or PTB-AS-OE. Following MTS assays (B), colony formation (C) and transwell migration assays (D) were performed to identify the rescue effect of PTB-AS to PTBP1 in regulating glioma tumorigenesis. Graphs indicate the average number of cells per field of the indicated cell lines in migration assays. The cell colonies were counted by Image-Pro Plus software and plotted. Data were expressed as mean  $\pm$  SD, n = 5. \* $P$  < 0.05; \*\* $P$  < 0.01 (Student's t test).

**E.** In situ hybridization for PTB-AS and PTBP1 on slides through T98G, U87MG and A172 cell. All images show the same magnification (40X). PTB-AS and PTBP1-mRNA intracellular localization was visualized in cytoplasm as the arrows directed.

**F.** U87MG cell were transfected with biotinylated the full length of PTB-AS or biotinylated eGFP as the NC. PTB-AS and eGFP expression levels were analysed by qRT-PCR. Data were expressed as mean  $\pm$  SD, n = 3.

**G.** The identification of effect on PTB-AS knocking down or overexpression before half-life assay. QRT-PCR was used to show the expression of PTB-AS. Data are shown as mean  $\pm$ SD of three independent experiments. \*\* $P$  < 0.01 (Student's t test).



**Figure S6**

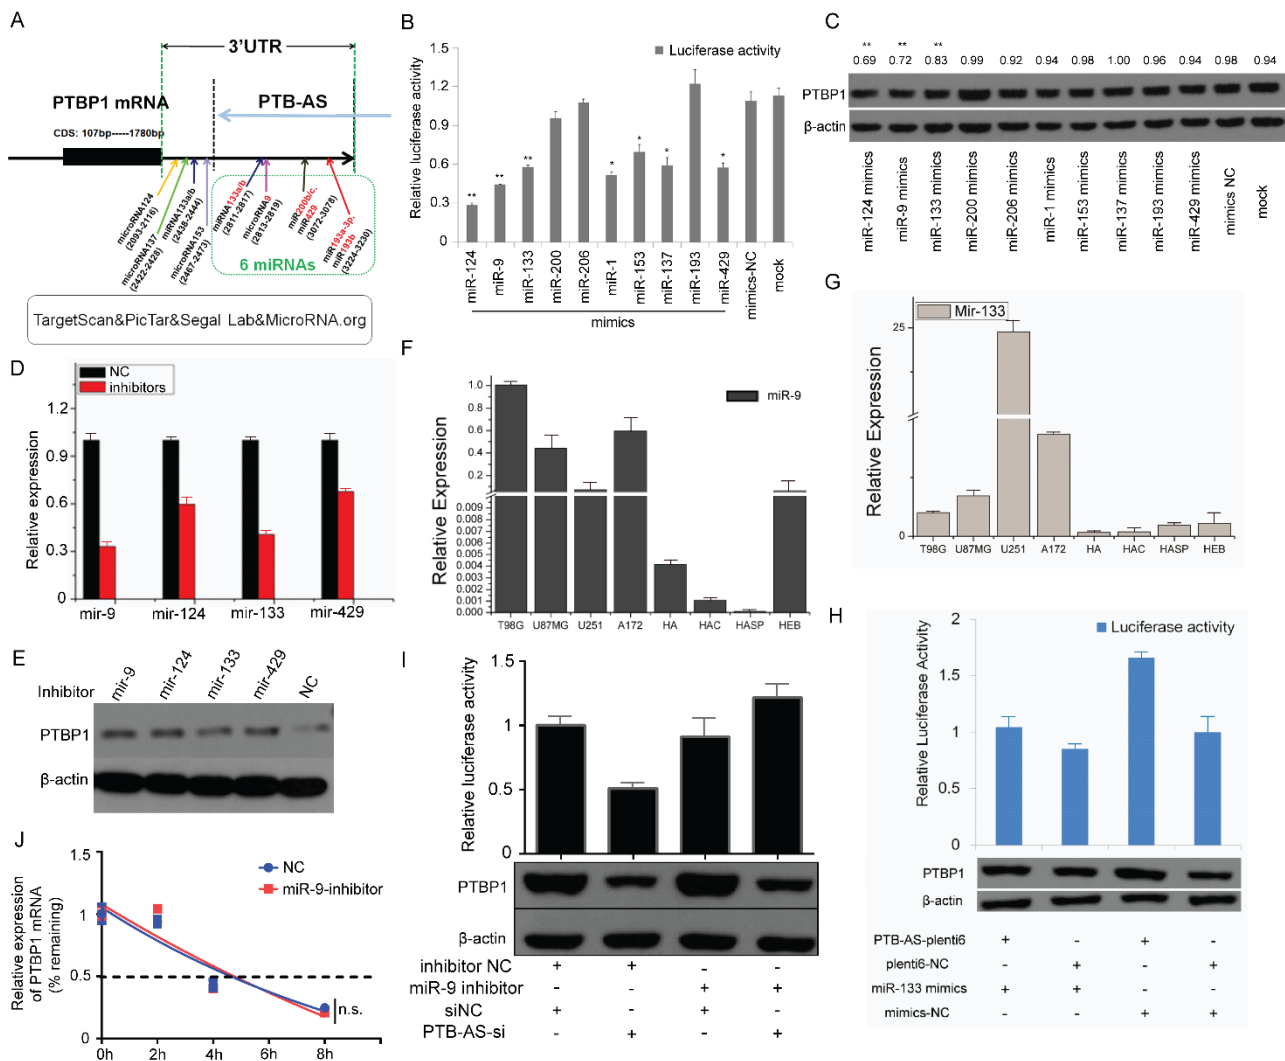

**Suppl Figure S6: MiR-9 plays significant role in regulating PTBP1 expression.**

**A.** Potential miRNAs which regulated PTBP1 were predicted using integrated bioinformatics tools and the relative position of binding site for these miRNAs.

**B.** All of miRNA mimics were separately transfected in U87MG cells and luciferase reporter assays were performed. Relative luciferase activity value was shown as the mean ± SD, n=3. \*P<0.05, \*\*P<0.01 (t test).

**C.** Western blotting experiments were performed after transfection of the mimics. The results of western blotting were quantified by densitometry and are shown as the ratios of PTBP1/β-actin protein levels (the values shown above the blots). Results were from three biological replicates.

**D and E.** U87MG were transfected with potential miRNAs to identify the effect of miRNAs on expression of PTBP1. Quantitative real-time PCR were performed to validate the changing of miRNAs. Data were expressed as mean ± SD, n = 3. Western blotting experiments were performed to identify the effect of miRNAs inhibitors on expression of PTBP1.

**F and G.** Relative expression profile of miR-9 or miR-133 in glioma and normal astrocyte cells. Quantitative real-time PCR was performed. Data were expressed as mean ± SD, n = 3.

**H.** Luciferase reporter assays and western blotting experiments were performed to validate the miR-

133 misregulated PTBP1 caused by overexpression of PTB-AS. Data were expressed as mean  $\pm$  SD, n = 3. Relative luciferase activity value was shown as the best result of two replicates. The results of western blotting were from three biological replicates.

**I.** U87MG cell were co-transfected with miR-9 inhibitor and PTB-AS-siRNA, and siNC or inhibitor-NC were negative control. Luciferase reporter assays and western blotting experiments were performed to validate the miR-9 re-regulated PTBP1 caused by downregulation of PTB-AS. Data were expressed as mean  $\pm$  SD, n = 3. Relative luciferase activity value was shown as the best result of two replicates. The results of western blotting were from three biological replicates.

**J.** Half-life assay for PTBP1 mRNA after inhibiting miR-9 expression. NC or miR-9 inhibitor was transfected into U87MG cells. Transcript decay curves were measured after transfection for 48 h when transcription was blocked by adding actinomycin D (5  $\mu$ g/mL). Transcripts remaining relative to the control gene were assessed by qRT-PCR. N.S. indicates no significance, and the analyses used nonlinear regression (one phase decay curve fit) to determine the half-life. Error bars show the standard deviation. The results were from three biological replicates.

**Figure S7**

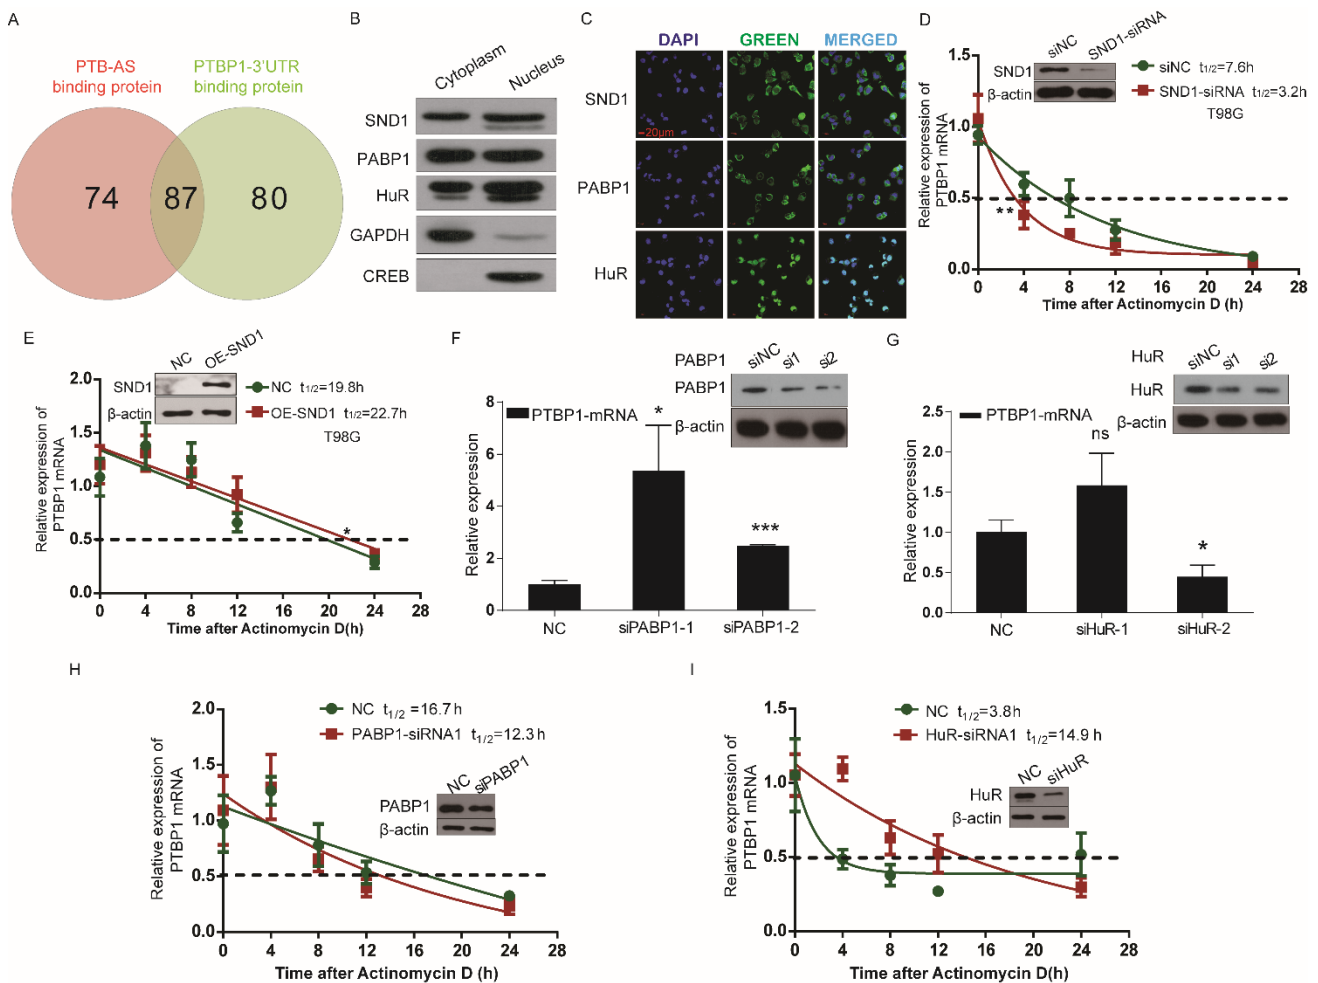

**Suppl Figure S7: Effects of HuR and PABP1 in the expression and half-life of PTBP1 mRNA.**

**A.** Venn diagram showing the overlap of genes occupied by genes pulled down by PTB-AS probe and PTBP1-3'UTR probe at high confidence in T98G cells as determined by mass spectrometry.

**B&C.** The cytoplasm/nuclear separation experiment and immunofluorescence (IFC) assay show the cellular localization of candidate proteins in glioma cells. GAPDH and CREB act as the positive control indicating cytoplasm or nuclear compositions, respectively. Scale Bar: 20  $\mu$  m.

**C and D.** T98G cells expressing control siRNA or SND1 siRNA / mock-vector (NC) or pcDNA4.0-SND1 plasmid (OE-SND1) were treated with actinomycin D (5  $\mu$ g/mL) for the indicated periods of time. Total RNA was then analysed by RT-qPCR to examine the mRNA half-life of PTBP1. Half-life was calculated by using one phase decay; Data shown are the mean  $\pm$  SD (n = 3; \* $P$ <0.05, \*\* $P$ <0.01, two-tailed t-test).

**E and F.** T98G cells were infected with two different siRNAs ((A) PABP1-siRNA1 or PABP1-siRNA2 and (B) HuR-siRNA1 or HuR-siRNA2) to knock down each gene. PTBP1 mRNA level were calculated by RT-qPCR. Data were expressed as mean  $\pm$  SD, n = 3. \* $P$  < 0.05; \*\* $P$  < 0.01, \*\*\* $P$  < 0.001 (Student's t test).

**G and H.** T98G cells expressing target or control siRNAs were treated with actinomycin D (5  $\mu$ g/mL) for the indicated periods of time. Total RNA was then analyzed by RT-qPCR to examine the half-life of PTBP1 mRNA. Half-life was calculated with linear fitting. Data were expressed as mean  $\pm$  SD, n = 3. \* $P$  < 0.05; \*\* $P$  < 0.01, \*\*\* $P$ <0.001 (Student's t test).

## Supplemental Tables and Table Legends

Supplemental Table S1: List of 380 genes identified as putative RBPs.

| RBPs Names             | Domain       | ISH Profiled? |
|------------------------|--------------|---------------|
| Fxr2                   | KH           | x             |
| Tdrkh                  | KH           | x             |
| Retrovirus-related gag | other        | x             |
| gene model 381         | KH           |               |
| similar to HPRP18      | other, prp18 | x             |
| Bicc1                  | KH           | x             |
| cw17                   | KH           | x             |
| Fmr1                   | KH           | x             |
| Refbp1                 | RRM          | x             |
| Cpsf1                  | RRM          | x             |
| Daz1                   | RRM          | x             |
| Elavl3                 | RRM          | x             |
| Ewsh                   | RRM          | x             |
| Nssr                   | RRM          | x             |
| G3bp1                  | RRM          | x             |
| Nsap11                 | RRM          | x             |
| Hnrpa/b                | RRM          | x             |
| Pabpc4l                | RRM          | x             |
| Pparg1b                | RRM          | x             |

|                      |            |          |
|----------------------|------------|----------|
| <b>Ptbp2</b>         | <b>RRM</b> | <b>x</b> |
| <b>Rbmy1a1</b>       | <b>RRM</b> | <b>x</b> |
| <b>4921506I22Rik</b> | <b>RRM</b> | <b>x</b> |
| <b>Msi1h</b>         | <b>RRM</b> | <b>x</b> |
| <b>Silg41</b>        | <b>RRM</b> | <b>x</b> |
| <b>Rbpms2</b>        | <b>RRM</b> | <b>x</b> |
| <b>3000004N20Rik</b> | <b>RRM</b> | <b>x</b> |
| <b>5730555F13Rik</b> | <b>RRM</b> | <b>x</b> |
| <b>2810036L13Rik</b> | <b>RRM</b> | <b>x</b> |
| <b>2610101N10Rik</b> | <b>RRM</b> | <b>x</b> |
| <b>8030431D03Rik</b> | <b>RRM</b> | <b>x</b> |
| <b>4932702K14Rik</b> | <b>RRM</b> | <b>x</b> |
| <b>U2af1</b>         | <b>RRM</b> | <b>x</b> |
| <b>1700012H05Rik</b> | <b>RRM</b> | <b>x</b> |
| <b>Snrpb2</b>        | <b>RRM</b> | <b>x</b> |
| <b>Rbm28</b>         | <b>RRM</b> | <b>x</b> |
| <b>Snrp70</b>        | <b>RRM</b> | <b>x</b> |
| <b>6330548G22Rik</b> | <b>RRM</b> | <b>x</b> |
| <b>C330027G06Rik</b> | <b>RRM</b> | <b>x</b> |
| <b>Rbm18</b>         | <b>RRM</b> | <b>x</b> |
| <b>2610019N13Rik</b> | <b>RRM</b> | <b>x</b> |
| <b>2610020H08Rik</b> | <b>RRM</b> | <b>x</b> |
| <b>Rad52b</b>        | <b>RRM</b> | <b>x</b> |
| <b>2610015J01Rik</b> | <b>RRM</b> | <b>x</b> |

|               |                                     |   |
|---------------|-------------------------------------|---|
| Rdbp          | RRM                                 | x |
| Drbp1         | RRM                                 | x |
| Refbp2        | RRM                                 | x |
| Sfrs4         | RRM                                 | x |
| Ppargc1       | RRM                                 | x |
| 4930565A21Rik | RRM                                 | x |
| U2af2         | RRM                                 | x |
| LOC381370     | RRM                                 | x |
| LOC225307     | RRM                                 | x |
| 2310016K04Rik | dsRM                                | x |
| Tarbp2        | dsRM                                | x |
| Spnr          | dsRM                                | x |
| Adar3         | dsRM                                | x |
| Tenr          | dsRM                                | x |
| Mrlp44        | dsRM                                | x |
| Dhx30         | dsRM                                | x |
| 2810055E05Rik | other, S1                           | x |
| 2610029K21Rik | G-patch                             | x |
| 2010009L17Rik | G-patch                             | x |
| 1300018I05Rik | G-patch                             | x |
| Bat4          | G-patch                             | x |
| Hrmt1I3       | other, arginine N-methyltransferase | x |
| LOC381813     | other, arginine N-methyltransferase | x |
| HrmtI16       | other, arginine N-methyltransferase | x |

|               |                                                 |   |
|---------------|-------------------------------------------------|---|
| LOC215034     | Piwi                                            | x |
| Top3a         | Zinc Knuckle                                    | x |
| 3110031B13Rik | Zinc Knuckle                                    | x |
| BC005685      | other                                           | x |
| Cnbp2         | Zinc Knuckle                                    | x |
| Zcchc10       | Zinc Knuckle                                    | x |
| 2700088M22Rik | RRM                                             | x |
| 1500031H04Rik | Zinc Knuckle                                    | x |
| Zcchc4        | Zinc Knuckle                                    | x |
| Zcchc12       | Zinc Knuckle                                    | x |
| Rn7sk         | other                                           | x |
| 2610524B01Rik | other, PHD                                      | x |
| Rpo2tc1       | other, transcription                            | x |
| LOC218298     | other, SKIP                                     | x |
| AI033314      | Tudor                                           | x |
| 2410004F06Rik | Tudor                                           | x |
| Gtrosa26as    | other, THUMP                                    | x |
| Adam5         | other, Zn dependent metalloproteinase<br>domain | x |
| Traf6         | RRM                                             | x |
| D3Wsu161c     | RRM                                             | x |
| Tlr5          | RRM                                             | x |
| 0610009D07Rik | RRM                                             | x |
| 5430431G03Rik | RRM                                             | x |

|               |                                   |   |
|---------------|-----------------------------------|---|
| 2600016B03Rik | RRM                               | x |
| 1810073H04Rik | RRM                               | x |
| 0610033I05Rik | RRM                               | x |
| 1110007F05Rik | RRM                               | x |
| 2610024N24Rik | RRM                               | x |
| 2010015M23Rik | RRM                               | x |
| 1700009P03Rik | RRM                               | x |
| 9530027K23Rik | RRM                               | x |
| Tdrd7         | RRM                               | x |
| Rbm16         | RRM                               | x |
| 2610209F03Rik | RRM                               | x |
| V1rc17        | RRM                               | x |
| 2210008M09Rik | RRM                               | x |
| Pprc1         | RRM                               | x |
| D8ertd233e    | RRM                               | x |
| D330023I21Rik | RRM                               | x |
| A430091O22Rik | RRM                               | x |
| BC013481      | RRM                               | x |
| 5730453I16Rik | RRM                               | x |
| 4921511I16Rik | dsRM                              | x |
| 4930403J07Rik | dsRM                              | x |
| Snrpe         | other, Sm protein                 | x |
| 2810441A10Rik | other, U5 snRNP associated domain | x |
| 2610031L17Rik | other, HAT                        | x |



|                      |                                          |          |
|----------------------|------------------------------------------|----------|
| <b>Snrpa1</b>        | <b>other, LRR</b>                        | <b>x</b> |
| <b>Prpf3</b>         | <b>other, PWI</b>                        | <b>x</b> |
| <b>Sf3a3</b>         | <b>other, PRP9</b>                       | <b>x</b> |
| <b>Sf3b3</b>         | <b>other, CPSF</b>                       | <b>x</b> |
| <b>Sf3b4</b>         | <b>RRM</b>                               | <b>x</b> |
| <b>Nxf2</b>          | <b>other, TAP-C</b>                      | <b>x</b> |
| <b>Nxf7</b>          | <b>other, TAP-C</b>                      | <b>x</b> |
| <b>Eif4a1</b>        | <b>DEAD, Superfamily II RNA helicase</b> | <b>x</b> |
| <b>Srrm1</b>         | <b>other, PWI</b>                        | <b>x</b> |
| <b>Ddx39</b>         | <b>DEAD, Superfamily II RNA helicase</b> | <b>x</b> |
| <b>G430041M01Rik</b> | <b>RRM</b>                               | <b>x</b> |
| <b>Lsm6</b>          | <b>other, Sm-protein</b>                 | <b>x</b> |
| <b>LOC384385</b>     | <b>other, prp18</b>                      | <b>x</b> |
| <b>MCG1038304</b>    | <b>RRM</b>                               | <b>x</b> |
| <b>Ascc3l1</b>       | <b>DEAD, Superfamily II RNA helicase</b> | <b>x</b> |
| <b>MCG1027004</b>    | <b>RRM</b>                               | <b>x</b> |
| <b>BC035291</b>      | <b>RRM</b>                               | <b>x</b> |
| <b>LOC216024</b>     | <b>RRM</b>                               | <b>x</b> |
| <b>Rbm11</b>         | <b>RRM</b>                               | <b>x</b> |
| <b>E030019O05</b>    | <b>RRM</b>                               | <b>x</b> |
| <b>D11Bwg0517e</b>   | <b>RRM</b>                               | <b>x</b> |
| <b>9930033H14Rik</b> | <b>RRM</b>                               | <b>x</b> |
| <b>1810017N16Rik</b> | <b>RRM</b>                               | <b>x</b> |
| <b>Gm761</b>         | <b>RRM</b>                               | <b>x</b> |

|               |      |   |
|---------------|------|---|
| 1700128F08Rik | RRM  | x |
| LOC436185     | RRM  | x |
| LOC195154     | RRM  | x |
| Gm411         | KH   | x |
| Gm1424        | KH   | x |
| Nova1         | KH   | x |
| Gm381         | KH   | x |
| 1810003N24Rik | KH   | x |
| Htatsf1       | RRM  | x |
| Cpeb4         | RRM  | x |
| LOC433054     | RRM  |   |
| LOC237032     | RRM  |   |
| Miwi          | Piwi |   |
| D8ertd233e    | RRM  |   |
| Rbmx2         | RRM  |   |
| MCG51890      | RRM  |   |
| AA517739      | RRM  |   |
| B230333C21Rik | RRM  |   |
| C330012H03Rik | KH   |   |
| C530047H08Rik | RRM  |   |
| Cstf2t        | RRM  |   |
| Oog4          | KH   |   |
| Rps3          | KH   |   |
| 1810035L17Rik | RRM  |   |

|                      |                     |          |
|----------------------|---------------------|----------|
| <b>ds8</b>           | <b>G-patch</b>      |          |
| <b>Khsrp</b>         | <b>KH</b>           |          |
| <b>Mela</b>          | <b>Zinc Knuckle</b> |          |
| <b>C430048L16Rik</b> | <b>RRM</b>          |          |
| <b>Cstf2</b>         | <b>RRM</b>          |          |
| <b>Dppa5</b>         | <b>KH</b>           |          |
| <b>Sfrs15</b>        | <b>RRM</b>          |          |
| <b>Raver</b>         | <b>RRM</b>          |          |
| <b>Rkhd1</b>         | <b>KH</b>           |          |
| <b>Rkhd2</b>         | <b>KH</b>           |          |
| <b>Rkhd3</b>         | <b>KH</b>           |          |
| <b>1700025B16Rik</b> | <b>RRM</b>          |          |
| <b>2410104I19Rik</b> | <b>RRM</b>          |          |
| <b>2810441O16Rik</b> | <b>RRM</b>          |          |
| <b>3100004P22Rik</b> | <b>RRM</b>          |          |
| <b>4930562C03Rik</b> | <b>RRM</b>          |          |
| <b>4933434H11Rik</b> | <b>RRM</b>          |          |
| <b>6430512A10Rik</b> | <b>RRM</b>          |          |
| <b>Pcbp2</b>         | <b>KH</b>           | <b>x</b> |
| <b>Pcbp4</b>         | <b>KH</b>           | <b>x</b> |
| <b>Igf2bp1</b>       | <b>KH</b>           | <b>x</b> |
| <b>Fxr1</b>          | <b>KH</b>           | <b>x</b> |
| <b>Hnrpk</b>         | <b>KH</b>           | <b>x</b> |
| <b>Igf2bp3</b>       | <b>KH</b>           | <b>x</b> |

|                |            |          |
|----------------|------------|----------|
| <b>Khdrbs1</b> | <b>KH</b>  | <b>x</b> |
| <b>Qk</b>      | <b>KH</b>  | <b>x</b> |
| <b>Khdrbs2</b> | <b>KH</b>  | <b>x</b> |
| <b>Khdrbs3</b> | <b>KH</b>  | <b>x</b> |
| <b>Ascc1</b>   | <b>KH</b>  | <b>x</b> |
| <b>Boll</b>    | <b>RRM</b> | <b>x</b> |
| <b>Bruno14</b> | <b>RRM</b> | <b>x</b> |
| <b>Mint</b>    | <b>RRM</b> | <b>x</b> |
| <b>Cpeb</b>    | <b>RRM</b> | <b>x</b> |
| <b>Cugbp1</b>  | <b>RRM</b> | <b>x</b> |
| <b>Elavl2</b>  | <b>RRM</b> | <b>x</b> |
| <b>Elavl4</b>  | <b>RRM</b> | <b>x</b> |
| <b>Cugbp2</b>  | <b>RRM</b> | <b>x</b> |
| <b>G3bp2</b>   | <b>RRM</b> | <b>x</b> |
| <b>Hnrpa1</b>  | <b>RRM</b> | <b>x</b> |
| <b>Hnrpc</b>   | <b>RRM</b> | <b>x</b> |
| <b>Hnrph1</b>  | <b>RRM</b> | <b>x</b> |
| <b>Hnrph2</b>  | <b>RRM</b> | <b>x</b> |
| <b>Hnrpr</b>   | <b>RRM</b> | <b>x</b> |
| <b>Raly</b>    | <b>RRM</b> | <b>x</b> |
| <b>Hnrpdl</b>  | <b>RRM</b> | <b>x</b> |
| <b>Ssb</b>     | <b>RRM</b> | <b>x</b> |
| <b>Myef2</b>   | <b>RRM</b> | <b>x</b> |
| <b>Rbm4</b>    | <b>RRM</b> | <b>x</b> |

|               |            |          |
|---------------|------------|----------|
| <b>Msi2h</b>  | <b>RRM</b> | <b>x</b> |
| <b>Rbms1</b>  | <b>RRM</b> | <b>x</b> |
| <b>Cnot4</b>  | <b>RRM</b> | <b>x</b> |
| <b>Np220</b>  | <b>RRM</b> | <b>x</b> |
| <b>Nsap1</b>  | <b>RRM</b> | <b>x</b> |
| <b>Ncl</b>    | <b>RRM</b> | <b>x</b> |
| <b>Pabpc2</b> | <b>RRM</b> | <b>x</b> |
| <b>Kist</b>   | <b>KH</b>  | <b>x</b> |
| <b>Fus</b>    | <b>RRM</b> | <b>x</b> |
| <b>Pabpn1</b> | <b>RRM</b> | <b>x</b> |
| <b>Ptbp1</b>  | <b>RRM</b> | <b>x</b> |
| <b>Sfpq</b>   | <b>RRM</b> | <b>x</b> |
| <b>Rbm10</b>  | <b>RRM</b> | <b>x</b> |
| <b>Rbm3</b>   | <b>RRM</b> | <b>x</b> |
| <b>Rbm6</b>   | <b>RRM</b> | <b>x</b> |
| <b>RbmX</b>   | <b>RRM</b> | <b>x</b> |
| <b>Rbpms</b>  | <b>RRM</b> | <b>x</b> |
| <b>Rnps1</b>  | <b>RRM</b> | <b>x</b> |
| <b>Sart3</b>  | <b>RRM</b> | <b>x</b> |
| <b>Rbms2</b>  | <b>RRM</b> | <b>x</b> |
| <b>Rnpc1</b>  | <b>RRM</b> | <b>x</b> |
| <b>Sfrs10</b> | <b>RRM</b> | <b>x</b> |
| <b>Sfrs2</b>  | <b>RRM</b> | <b>x</b> |
| <b>Snrpa</b>  | <b>RRM</b> | <b>x</b> |

|                  |            |          |
|------------------|------------|----------|
| <b>U2af1-rs1</b> | <b>RRM</b> | <b>x</b> |
| <b>U2af1-rs2</b> | <b>RRM</b> | <b>x</b> |
| <b>Synj2</b>     | <b>RRM</b> | <b>x</b> |
| <b>Tia1</b>      | <b>RRM</b> | <b>x</b> |
| <b>Tial1</b>     | <b>RRM</b> | <b>x</b> |
| <b>Ppil4</b>     | <b>RRM</b> | <b>x</b> |
| <b>Rbm19</b>     | <b>RRM</b> | <b>x</b> |
| <b>Rbm8</b>      | <b>RRM</b> | <b>x</b> |
| <b>Rbm22</b>     | <b>RRM</b> | <b>x</b> |
| <b>Nono</b>      | <b>RRM</b> | <b>x</b> |
| <b>Sfrs6</b>     | <b>RRM</b> | <b>x</b> |
| <b>Sfrs9</b>     | <b>RRM</b> | <b>x</b> |
| <b>Rbm14</b>     | <b>RRM</b> | <b>x</b> |
| <b>Pabpc1</b>    | <b>RRM</b> | <b>x</b> |
| <b>Pspc1</b>     | <b>RRM</b> | <b>x</b> |
| <b>Hnrpm</b>     | <b>RRM</b> | <b>x</b> |
| <b>Rbm12</b>     | <b>RRM</b> | <b>x</b> |
| <b>Nol8</b>      | <b>RRM</b> | <b>x</b> |
| <b>Tnrc6</b>     | <b>RRM</b> | <b>x</b> |
| <b>Rnpc2</b>     | <b>RRM</b> | <b>x</b> |
| <b>Acin1</b>     | <b>RRM</b> | <b>x</b> |
| <b>A2bp1</b>     | <b>RRM</b> | <b>x</b> |
| <b>Ppie</b>      | <b>RRM</b> | <b>x</b> |
| <b>Cirbp</b>     | <b>RRM</b> | <b>x</b> |

|                        |                                            |          |
|------------------------|--------------------------------------------|----------|
| <b>Stau2</b>           | <b>dsRM</b>                                | <b>x</b> |
| <b>Stau1</b>           | <b>dsRM</b>                                | <b>x</b> |
| <b>Prkra</b>           | <b>dsRM</b>                                | <b>x</b> |
| <b>Ilf3</b>            | <b>dsRM</b>                                | <b>x</b> |
| <b>Adarb1</b>          | <b>dsRM</b>                                | <b>x</b> |
| <b>Adar</b>            | <b>dsRM</b>                                | <b>x</b> |
| <b>Prkr</b>            | <b>dsRM</b>                                | <b>x</b> |
| <b>Ddx9</b>            | <b>dsRM</b>                                | <b>x</b> |
| <b>Pdcd11</b>          | <b>other, S1</b>                           | <b>x</b> |
| <b>Supt6h</b>          | <b>other, S1</b>                           | <b>x</b> |
| <b>Tfip11</b>          | <b>G-patch</b>                             | <b>x</b> |
| <b>Rbm5</b>            | <b>G-patch</b>                             | <b>x</b> |
| <b>Pum1</b>            | <b>other, PUF</b>                          | <b>x</b> |
| <b>Hrmt1l2 (PRMT1)</b> | <b>other, arginine N-methyltransferase</b> | <b>x</b> |
| <b>Hrmt1l1</b>         | <b>other, arginine N-methyltransferase</b> | <b>x</b> |
| <b>Piwil2</b>          | <b>Piwi</b>                                | <b>x</b> |
| <b>Eif2c4</b>          | <b>Piwi</b>                                | <b>x</b> |
| <b>Eif2c3</b>          | <b>Piwi</b>                                | <b>x</b> |
| <b>Peg10</b>           | <b>Zinc Knuckle</b>                        | <b>x</b> |
| <b>Cnbp</b>            | <b>other, arginine N-methyltransferase</b> | <b>x</b> |
| <b>Zcchc7</b>          | <b>Zinc Knuckle</b>                        | <b>x</b> |
| <b>Pnpt1</b>           | <b>KH</b>                                  | <b>x</b> |
| <b>Carm1</b>           | <b>other, arginine N-methyltransferase</b> | <b>x</b> |
| <b>Cops5</b>           | <b>other, CSN5 domain</b>                  | <b>x</b> |

|                      |                     |          |
|----------------------|---------------------|----------|
| <b>Scand1</b>        | <b>other, LR</b>    | <b>x</b> |
| <b>Ncoa6ip</b>       | <b>other, THUMP</b> | <b>x</b> |
| <b>Ncoa3</b>         | <b>other, PAS</b>   | <b>x</b> |
| <b>Ptcd2</b>         | <b>other, PPR</b>   | <b>x</b> |
| <b>Ptcd1</b>         | <b>other, PPR</b>   | <b>x</b> |
| <b>Akap1</b>         | <b>KH</b>           | <b>x</b> |
| <b>Sfrs1</b>         | <b>RRM</b>          | <b>x</b> |
| <b>Hnrpd</b>         | <b>RRM</b>          | <b>x</b> |
| <b>Son</b>           | <b>dsRM</b>         | <b>x</b> |
| <b>Eif2c2 (AGO2)</b> | <b>Piwi</b>         | <b>x</b> |
| <b>Dazap1</b>        | <b>RRM</b>          | <b>x</b> |
| <b>Col4a3</b>        | <b>RRM</b>          | <b>x</b> |
| <b>Hnrpl</b>         | <b>RRM</b>          | <b>x</b> |
| <b>Htf9c</b>         | <b>RRM</b>          | <b>x</b> |
| <b>Rbmxt</b>         | <b>RRM</b>          | <b>x</b> |
| <b>Rpo1-2</b>        | <b>RRM</b>          | <b>x</b> |
| <b>Eif3s9</b>        | <b>RRM</b>          | <b>x</b> |
| <b>Afg3l2</b>        | <b>RRM</b>          | <b>x</b> |
| <b>Rbm21</b>         | <b>RRM</b>          | <b>x</b> |
| <b>Poldip3</b>       | <b>RRM</b>          | <b>x</b> |
| <b>Rbm17</b>         | <b>RRM</b>          | <b>x</b> |
| <b>Wdr9</b>          | <b>RRM</b>          | <b>x</b> |
| <b>Slc6a8</b>        | <b>RRM</b>          | <b>x</b> |
| <b>Hnrpa3</b>        | <b>RRM</b>          | <b>x</b> |



|        |                                     |   |
|--------|-------------------------------------|---|
| Rbms3  | RRM                                 | x |
| Cova1  | RRM                                 | x |
| Rnpep  | RRM                                 | x |
| Safb   | RRM                                 | x |
| Rbm27  | RRM                                 | x |
| Tardbp | RRM                                 | x |
| Grsf1  | RRM                                 | x |
| Rbed1  | RRM                                 | x |
| Csad   | RRM                                 | x |
| Lsm4   | other, Sm protein                   | x |
| Lsm7   | other, Sm protein                   | x |
| Crnk1  | other, HAT                          | x |
| Sf3a1  | other, SWAP                         | x |
| Snrpg  | other, Sm protein                   | x |
| Cpsf5  | other, mRNA cleavage factor         | x |
| Snrpf  | other, Sm protein                   | x |
| Prp17  | other, WD40                         | x |
| Sf3b1  | other, U2 snRNP spliceosome subunit | x |
| Prpf8  | other, JAB/MPN                      | x |
| Nxt1   | other, NTF2                         | x |
| Nxf1   | other, TAP-C                        | x |
| Rpl5   | other, Ribosomal L18p               | x |
| Nup88  | other, nuclear pore                 | x |
| Ddx19  | DEAD, Superfamily II RNA helicase   | x |

|         |                     |   |
|---------|---------------------|---|
| Gle1l   | other               | x |
| Nup98   | other, nuclear pore | x |
| Lsm3    | RRM                 | x |
| Sip1    | other, SIP1         | x |
| Hnrpf   | RRM                 | x |
| Hnrpa0  | RRM                 | x |
| Taf15   | RRM                 | x |
| Dnd1    | RRM                 | x |
| Sfrs12  | RRM                 | x |
| Sfrs7   | RRM                 | x |
| Pabpc5  | RRM                 | x |
| Rbm15   | RRM                 | x |
| Fubp1   | KH                  | x |
| Hrb2    | KH                  | x |
| Hdlbp   | KH                  | x |
| Pcbp3   | KH                  | x |
| Cpeb2   | RRM                 | x |
| Ankhd1  | KH                  | x |
| Dclre1b | KH                  | x |
| Rod1    | RRM                 | x |
| Elav1   | RRM                 | x |
| Sfrs5   | RRM                 | x |
| Thumpd1 | other, THUMP        |   |
| Lrpprc  | other, PPR          |   |

|          |            |   |
|----------|------------|---|
| Zfp422   | RRM        |   |
| Fubp3    | KH         |   |
| Pum2     | other, PUF |   |
| Wbscr1   | RRM        |   |
| Etohi2   | dsRM       |   |
| Hnrpa2b1 | RRM        |   |
| Mki67ip  | RRM        |   |
| Ncbp2    | RRM        |   |
| Sfrs3    | RRM        |   |
| Dscr111  | RRM        |   |
| Eif3s4   | RRM        |   |
| Anks1    | KH         |   |
| Cpsf6    | RRM        |   |
| Dgcr8    | dsRM       |   |
| Dicer1   | dsRM       |   |
| Matrin 3 | RRM        |   |
| Pcbp1    | KH         |   |
| Safb2    | RRM        |   |
| Tnrc4    | RRM        |   |
| Rbm25    | RRM        |   |
| Rbm7     | RRM        |   |
| Rbm9     | RRM        |   |
| Pinx1    | G-patch    | x |
| Bruno16  | RRM        | x |

|                  |                |          |
|------------------|----------------|----------|
| <b>Gpatc1</b>    | <b>G-patch</b> | <b>x</b> |
| <b>LOC383923</b> | <b>Piwi</b>    | <b>x</b> |

---

('x' means 'not present'.)

Supplemental Table S2: List of 199 RBPs which exist NATs in their genomic locus.

| <b>RBPs Names</b> | <b>Domain</b> | <b>NAT exists?</b> | <b>NAT type</b>     | <b>NAT detail</b>                          | <b>ISH Profiled?</b> |
|-------------------|---------------|--------------------|---------------------|--------------------------------------------|----------------------|
| Pcbp4             | KH            | y                  | tail to tail        | GPR62 G protein-coupled receptor 62        | x                    |
| Ascc1             | KH            | y                  | head to head        | AA984891                                   | x                    |
| Boll              | RRM           | y                  | tail to tail        | BC021693                                   | x                    |
| Mint              | RRM           | y                  | head to head        | AK124018                                   | x                    |
| Elavl2            | RRM           | y                  | full length (small) | AF147374                                   | x                    |
| Elavl4            | RRM           | y                  | full length         | BE218251                                   | x                    |
| Hnrpa1            | RRM           | y                  | full length         | DB552539                                   | x                    |
| Hnrpc             | RRM           | y                  | full length         | BU607926                                   | x                    |
| Hnrph1            | RRM           | y                  | full length         | R05743                                     | x                    |
| Hnrph2            | RRM           | y                  | full length         | CA434430                                   | x                    |
| Hnrpr             | RRM           | y                  | full length         | AW136837                                   | x                    |
| Raly              | RRM           | y                  | full length         | AA074799                                   | x                    |
| Hnrpdl            | RRM           | y                  | head to head        | DA129778                                   | x                    |
| Myef2             | RRM           | y                  | tail to tail        | SLC24A5 solute carrier family 24, member 5 | x                    |
| Rbm4              | RRM           | y                  | full length         | BE467850                                   | x                    |

|        |     |   |                 |          |   |
|--------|-----|---|-----------------|----------|---|
| Msi2h  | RRM | y | full length     | AI694538 | x |
| Rbms1  | RRM | y | full length     | AL704230 | x |
| Cnot4  | RRM | y | full length     | CA439725 | x |
| Np220  | RRM | y | full length     | BG207090 | x |
| Ncl    | RRM | y | full length     | DB339881 | x |
| Pabpc2 | RRM | y | full length     | CD364547 | x |
| Kist   | KH  | y | full length     | AV659210 | x |
| Fus    | RRM | y | full length     | DB070270 | x |
| Pabpn1 | RRM | y | full length     | BU608633 | x |
| Sfpq   | RRM | y | full length     | BG028196 | x |
| Rbm10  | RRM | y | head to<br>head | BE379249 | x |
| Rbm3   | RRM | y | head to<br>head | AK129559 | x |
| Rbm6   | RRM | y | full length     | AV759137 | x |
| Rbmx   | RRM | y | full length     | AI131042 | x |
| Rbpms  | RRM | y | head to<br>head | CF129999 | x |
| Rnps1  | RRM | y | full length     | BQ672813 | x |
| Sart3  | RRM | y | full length     | AI023828 | x |
| Rbms2  | RRM | y | tail to tail    | AK096412 | x |

|        |           |   |              |                                                            |   |
|--------|-----------|---|--------------|------------------------------------------------------------|---|
| Rnpc1  | RRM       | y | head to head | AK096426                                                   | x |
| Sfrs10 | RRM       | y | full length  | BU686967                                                   | x |
| Sfrs2  | RRM       | y | head to head | ET hypothetical protein ET                                 | x |
| Snrpa  | RRM       | y | head to head | CX163256                                                   | x |
| Tia1   | RRM       | y | head to head | T55036                                                     | x |
| Rbm8   | RRM       | y | tail to tail | GNRHR2 gonadotropin-releasing hormone (type 2) receptor 2  | x |
| Sfrs9  | RRM       | y | tail to tail | 15E1.2 hypothetical protein LOC283459                      | x |
| Nol8   | RRM       | y | head to head | CENPP centromere protein P                                 | x |
| Acin1  | RRM       | y | head to head | C14orf119 chromosome 14 open reading frame 119             | x |
| Ppie   | RRM       | y | tail to tail | BMP8B bone morphogenetic protein 8b (osteogenic protein 2) | x |
| Adarb1 | dsRM      | y | head to head | AW294061                                                   | x |
| Prkr   | dsRM      | y | tail to tail | BG189068                                                   | x |
| Ddx9   | dsRM      | y | head to head | AK001442                                                   | x |
| Supt6h | other, S1 | y | head to head | BQ310438                                                   | x |

|                    |                                         |   |                 |                                              |   |
|--------------------|-----------------------------------------|---|-----------------|----------------------------------------------|---|
| Tfip11             | G-patch                                 | y | tail to tail    | CTB-1048E9.5 similar to<br>SRR1-like protein | x |
| Rbm5               | G-patch                                 | y | tail to tail    | AK125500                                     | x |
| Hrmt112<br>(PRMT1) | other, arginine N-<br>methyltransferase | y | head to<br>head | IRF3 to BCL2L12                              | x |
| Eif2c3             | Piwi                                    | y | full length     | AW511062                                     | x |
| Peg10              | Zinc Knuckle                            | y | full length     | AW137627                                     | x |
| Cnbp               | other, arginine N-<br>methyltransferase | y | head to<br>head | DB242329                                     | x |
| Zcchc7             | Zinc Knuckle                            | y | full length     | BF512512                                     | x |
| Pnpt1              | KH                                      | y | full length     | AW296091                                     | x |
| Carm1              | other, arginine N-<br>methyltransferase | y | tail to tail    | BM552692                                     | x |
| Cops5              | other, CSN5<br>domain                   | y | tail to tail    | CSPP1 to ARFGEF1                             | x |
| Scand1             | other, LR                               | y | head to<br>head | DB056200                                     | x |
| Ncoa6ip            | other, THUMP                            | y | head to<br>head | TMEM68 transmembrane<br>protein 68           | x |
| Ncoa3              | other, PAS                              | y | full length     | DB275059                                     | x |
| Ptcd2              | other, PPR                              | y | full length     | AW087699                                     | x |
| Ptcd1              | other, PPR                              | y | tail to tail    | BC001578                                     | x |
| Akap1              | KH                                      | y | full length     | BU675476                                     | x |
| Sfrs1              | RRM                                     | y | head to<br>head | DA002141                                     | x |



|               |      |   |              |                                |   |
|---------------|------|---|--------------|--------------------------------|---|
| Hnrpd         | RRM  | y | head to head | DA129778                       | x |
| Son           | dsRM | y | tail to tail | AI480262                       | x |
| Eif2c2 (AGO2) | Piwi | y | head to head | AF426412                       | x |
| Dazap1        | RRM  | y | full length  | AK094875                       | x |
| Col4a3        | RRM  | y | tail to tail | AK056332                       | x |
| Hnrpl         | RRM  | y | full length  | AA937108                       | x |
| Htf9c         | RRM  | y | head to head | AK097659                       | x |
| Rbmxrt        | RRM  | y | full length  | AI131042                       | x |
| Rpo1-2        | RRM  | y | full length  | AI223157                       | x |
| Eif3s9        | RRM  | y | full length  | BF512712                       | x |
| Afg3l2        | RRM  | y | tail to tail | BC039717                       | x |
| Rbm21         | RRM  | y | tail to tail | AK125351                       | x |
| Poldip3       | RRM  | y | tail to tail | BC031838 SERHL and CTA-126B4.3 | x |
| Rbm17         | RRM  | y | full length  | BP398070                       | x |
| Wdr9          | RRM  | y | full length  | AA207251                       | x |
| Slc6a8        | RRM  | y | head to head | BI598085                       | x |
| Hnrpa3        | RRM  | y | tail to tail | BI488549                       | x |

|        |                             |   |              |                                              |   |
|--------|-----------------------------|---|--------------|----------------------------------------------|---|
| Rbms3  | RRM                         | y | head to head | DA506411                                     | x |
| Cova1  | RRM                         | y | full length  | DB449817                                     | x |
| Rnpep  | RRM                         | y | head to head | AA150807                                     | x |
| Safb   | RRM                         | y | full length  | BM563776                                     | x |
| Rbm27  | RRM                         | y | full length  | AW298002                                     | x |
| Tardbp | RRM                         | y | full length  | BU675715                                     | x |
| Grsf1  | RRM                         | y | full length  | BG391541                                     | x |
| Rbed1  | RRM                         | y | full length  | DA107497                                     | x |
| Csad   | RRM                         | y | head to head | ZNF740 zinc finger protein 740               | x |
| Lsm4   | other, Sm protein           | y | full length  | AI282073                                     | x |
| Lsm7   | other, Sm protein           | y | tail to tail | AW057599                                     | x |
| Crnk11 | other, HAT                  | y | head to head | C20orf26 chromosome 20 open reading frame 26 | x |
| Sf3a1  | other, SWAP                 | y | head to head | BC018040                                     | x |
| Snrpg  | other, Sm protein           | y | full length  | EB386723                                     | x |
| Cpsf5  | other, mRNA cleavage factor | y | tail to tail | BF966722                                     | x |
| Snrpf  | other, Sm protein           | y | tail to tail | DA746379                                     | x |
| Prp17  | other, WD40                 | y | full length  | CA397410                                     | x |

|        |                                           |   |                 |                           |   |
|--------|-------------------------------------------|---|-----------------|---------------------------|---|
| Sf3b1  | other, U2 snRNP<br>spliceosome<br>subunit | y | full length     | CA502883                  | x |
| Prpf8  | other, JAB/MPN                            | y | full length     | AA399588                  | x |
| Nxt1   | other, NTF2                               | y | head to<br>head | BE891551                  | x |
| Nxf1   | other, TAP-C                              | y | full length     | DB039117                  | x |
| Rpl5   | other, Ribosomal<br>L18p                  | y | head to<br>head | U66589                    | x |
| Nup88  | other, nuclear<br>pore<br>DEAD,           | y | tail to tail    | NM_001212                 | x |
| Ddx19  | Superfamily II<br>RNA helicase            | y | full length     | BC039497                  | x |
| Gle11  | other                                     | y | tail to tail    | BG397948                  | x |
| Nup98  | other, nuclear<br>pore                    | y | full length     | BF309280                  | x |
| Lsm3   | RRM                                       | y | full length     | DB228065                  | x |
| Sip1   | other, SIP1                               | y | full length     | CA422147                  | x |
| Hnrpf  | RRM                                       | y | full length     | AI133166                  | x |
| Taf15  | RRM                                       | y | full length     | AK130999                  | x |
| Dnd1   | RRM                                       | y | tail to tail    | WDR55 WD repeat domain 55 | x |
| Sfrs12 | RRM                                       | y | full length     | CA312467                  | x |
| Sfrs7  | RRM                                       | y | full length     | DA568942                  | x |

|         |              |   |              |                                            |   |
|---------|--------------|---|--------------|--------------------------------------------|---|
| Pabpc5  | RRM          | y | full length  | DA375776                                   | x |
| Rbm15   | RRM          | y | full length  | BM999102                                   | x |
| Fubp1   | KH           | y | head to head | NEXN to C1orf118                           | x |
| Hrb2    | KH           | y | tail to tail | GLIPR1 GLI pathogenesis-related 1 (glioma) | x |
| Hdlbp   | KH           | y | head to head | NM_001008491 SEPT2 septin 2                | x |
| Cpeb2   | RRM          | y | tail to tail | AI760149                                   | x |
| Ankhd1  | KH           | y | full length  | BI793092                                   | x |
| Dclre1b | KH           | y | tail to tail | AK123199                                   | x |
| Rod1    | RRM          | y | full length  | BU607910                                   | x |
| Elavl1  | RRM          | y | full length  | W37464                                     | x |
| Sfrs5   | RRM          | y | tail to tail | T67695                                     | x |
| Thumpd1 | other, THUMP | y | full length  | DB543799                                   |   |
| Lrpprc  | other, PPR   | y | full length  | BC031947                                   |   |
| Zfp422  | RRM          | y | tail to tail | BC026193                                   |   |
| Fubp3   | KH           | y | full length  | DB524448                                   |   |
| Pum2    | other, PUF   | y | full length  | BF513882                                   |   |
| Wbscr1  | RRM          | y | head to head | AI863284                                   |   |

|          |         |   |              |                                                                |   |
|----------|---------|---|--------------|----------------------------------------------------------------|---|
| Etohi2   | dsRM    | y | tail to tail | BG219344                                                       |   |
| Hnrpa2b1 | RRM     | y | head to head | CBX3 chromobox homolog 3<br>(HP1 gamma homolog,<br>Drosophila) |   |
| Mki67ip  | RRM     | y | tail to tail | AK098264                                                       |   |
| Ncbp2    | RRM     | y | full length  | DA277609                                                       |   |
| Sfrs3    | RRM     | y | full length  | BX464843                                                       |   |
| Dscr111  | RRM     | y | full length  | BC043004                                                       |   |
| Eif3s4   | RRM     | y | tail to tail | P2RY11 purinergic receptor<br>P2Y, G-protein coupled, 11       |   |
| Anks1    | KH      | y | full length  | AI243659                                                       |   |
| Cpsf6    | RRM     | y | full length  | AK098338                                                       |   |
| Dgcr8    | dsRM    | y | full length  | CA442060                                                       |   |
| Matrin 3 | RRM     | y | full length  | CB242024                                                       |   |
| Safb2    | RRM     | y | full length  | BM563776                                                       |   |
| Tnrc4    | RRM     | y | full length  | DB535646                                                       |   |
| Rbm25    | RRM     | y | full length  | CR739627                                                       |   |
| Rbm7     | RRM     | y | full length  | BG196362                                                       |   |
| Rbm9     | RRM     | y | full length  | CB267142                                                       |   |
| Pinx1    | G-patch | y | tail to tail | PINX1 PIN2-interacting<br>protein 1 BC043573                   | x |

|                  |         |   |                 |                                                              |   |
|------------------|---------|---|-----------------|--------------------------------------------------------------|---|
| Brunol6          | RRM     | y | tail to tail    | BC034424                                                     | x |
| Gpatc1           | G-patch | ? |                 |                                                              | x |
| LOC383923        | Piwi    | ? |                 |                                                              | x |
| Pcbp2            | KH      | y | tail to tail    | MAP3K12 mitogen-activated<br>protein kinase kinase kinase 12 | x |
| Igf2bp1          | KH      | y | head to<br>head | BE044435                                                     | x |
| Fxr1             | KH      | y | tail to tail    | BU686455                                                     | x |
| Hnrpk<br>=hnRNPk | KH      | y | full length     | AW978702                                                     | x |
| Igf2bp3          | KH      | y | tail to tail    | AK127742                                                     | x |
| Khdrbs1          | KH      | y | full length     | CA417903                                                     | x |
| Qk               | KH      | y | full length     | DB530476                                                     | x |
| Khdrbs2          | KH      | y | full length     | CA391235                                                     | x |
| Khdrbs3          | KH      | y | full length     | CA388804                                                     | x |
| Brunol4          | RRM     | y | tail to tail    | DB209115                                                     | x |
| Cpeb             | RRM     | y | head to<br>head | BC050629                                                     | x |
| Cugbp1           | RRM     | y | tail to tail    | PTPMT1 and KBTBD4                                            | x |
| Cugbp2           | RRM     | y | full length     | BM931184                                                     | x |
| G3bp2            | RRM     | y | full length     | BM978447                                                     | x |

|                   |     |   |              |                                    |   |
|-------------------|-----|---|--------------|------------------------------------|---|
| Ssb               | RRM | y | tail to tail | METTL5 methyltransferase<br>like 5 | x |
| Nsap1=hnRNP-<br>Q | RRM | y | full length  | DA447957                           | x |
| Ptbp1             | RRM | y | full length  | BM691399                           | x |
| U2af1-rs1         | RRM | y | full length  | BU619109                           | x |
| U2af1-rs2         | RRM | y | full length  | BC039434                           | x |
| Synj2             | RRM | y | full length  | BM683410                           | x |
| Tial1             | RRM | y | full length  | DB080956                           | x |
| Ppil4             | RRM | y | full length  | DB542130                           | x |
| Rbm19             | RRM | y | full length  | DA295001                           | x |
| Rbm22             | RRM | y | full length  | DB572704                           | x |
| Nono              | RRM | y | full length  | DA667525                           | x |
| Sfrs6             | RRM | y | full length  | CD243053                           | x |
| Rbm14             | RRM | y | full length  | BE467850                           | x |
| Pabpc1            | RRM | y | full length  | CD364547                           | x |
| Pspc1             | RRM | y | full length  | DR978109                           | x |
| Hnrpm             | RRM | y | full length  | BC045573                           | x |
| Rbm12             | RRM | y | full length  | BM968574                           | x |
| Tnrc6             | RRM | y | full length  | BX495114                           | x |

|            |                                     |   |              |             |   |
|------------|-------------------------------------|---|--------------|-------------|---|
| Rnpc2      | RRM                                 | y | full length  | BG429761    | x |
| A2bp1      | RRM                                 | y | full length  | BM669724    | x |
| Cirbp      | RRM                                 | y | full length  | BM665199    | x |
| Stau2      | dsRM                                | y | full length  | CK818592    | x |
| Stau1      | dsRM                                | y | full length  | CA439621    | x |
| Prkra      | dsRM                                | y | full length  | NEB nebulin | x |
| Ilf3       | dsRM                                | y | full length  | DA854620    | x |
| Adar=adar1 | dsRM                                | y | full length  | CD514840    | x |
| Pdcd11     | other, S1                           | y | full length  | AY007124    | x |
| Pum1       | other, PUF                          | y | full length  | DB521106    | x |
| Hrmt111    | other, arginine N-methyltransferase | y | full length  | BQ017509    | x |
| Piwil2     | Piwi                                | y | full length  | BQ448561    | x |
| Eif2c4     | Piwi                                | y | full length  | BQ017637    | x |
| Hnrpa0     | RRM                                 | y | tail to tail | NM_016603   | x |
| Pcbp3      | KH                                  | y | head to head | DA117170    | x |
| Dicer1     | dsRM                                | y | full length  | AA931786    |   |
| Pcbp1      | KH                                  | y | head to head | DA872092    |   |

---

('y' means 'Yes' and 'x' means 'not present')



Supplemental Table S3: List of 12 NATs which had been perfectly identified by Reverse Transcription-PCR (RT-PCR).

| <b>RBPs<br/>Names</b> | <b>NAT<br/>exists?</b> | <b>NAT type and<br/>detail</b> | <b>NAT detail</b>                                            | <b>Domain</b> | <b>ISH Profiled?</b> |
|-----------------------|------------------------|--------------------------------|--------------------------------------------------------------|---------------|----------------------|
| Pcbp2                 | y                      | tail to tail                   | MAP3K12 mitogen-activated protein<br>kinase kinase kinase 12 | KH            | x                    |
| Hnrpk =hnRNPk         | y                      | full length                    | AW978702                                                     | KH            | x                    |
| Ssb                   | y                      | tail to tail                   | METTL5 methyltransferase like 5                              | RRM           | x                    |
| Nsap1=hnRNP-Q         | y                      | full length                    | DA447957                                                     | RRM           | x                    |
| Ptbp1                 | y                      | full length                    | BM691399                                                     | RRM           | x                    |
| Adar=adar1            | y                      | full length                    | CD514840                                                     | dsRM          | x                    |
| Hnrpa0                | y                      | tail to tail                   | NM_016603                                                    | RRM           | x                    |
| Pcbp3                 | y                      | head to head                   | DA117170                                                     | KH            | x                    |
| Dicer1                | y                      | full length                    | AA931786                                                     | dsRM          |                      |
| Pcbp1                 | y                      | head to head                   | DA872092                                                     | KH            | Present              |
| Cirbp                 | y                      | full length                    | BM665199                                                     | RRM           | x                    |
| Hnrpa1                | y                      | full length                    | DB552539                                                     | RRM           | Present              |

('y' means 'Yes' and 'x' means 'not present')

Supplemental Table S4: List of primers for RACE and PCR.

| <b>name</b>             | <b>application</b> | <b>Sequence (5'-3')</b>             |
|-------------------------|--------------------|-------------------------------------|
| PTB-AS-5'RACE-GSP1      | RACE               | GTAATTAAGTCACAGGCAGG                |
| PTB-AS-5'RACE-GSP2      | RACE               | CACCACGCCTTCACCTGCAG                |
| PTB-AS-5'RACE-GSP3      | RACE               | GCCTGCCTCTGATGCTGGGAC               |
| PTB-AS-5'RACE-GSP4      | RACE               | CGTAAAAGCGTGTAACAAGGGTG             |
| PTB-AS-3'RACE-GSP1      | RACE               | TACTGAGCCTGGAATTGC                  |
| PTB-AS-3'RACE-GSP2      | RACE               | CACCCTTGTTACACGCTTTTACG             |
| PTB-AS-3'RACE-GSP3      | RACE               | GAGCACAAAGACAGGAGGAGCG              |
| PTB-AS-3'RACE-GSP4      | RACE               | CTGCAGGTGAAGGCGTGGTG                |
| PTB-AS-3'RACE-GSP5      | RACE               | CCTGCTCTCTGGAAACTGGGTC              |
| PTB-AS-Northern-probe-F | Northern           | CCCAAGCTTGCTCTTGGTCATTCGCTCTGG      |
| PTB-AS-Northern-probe-R | Northern           | CGGAATTCTGTGTTTTGCCTGCCTCTGA        |
| PTB-AS-biotin-probe-F   | Biotin pull down   | CCCAAGCTTGCTCTTGGTCATTCGCTCTGG      |
| PTB-AS-biotin-probe-R   | Biotin pull down   | CGGAATTCTGTGGTATTACCTTGTATGCTGTTACT |

|                           |                |                                      |
|---------------------------|----------------|--------------------------------------|
| GAPDH-F                   | qRT-PCR        | GGTCATCCATGACAACCTTTGG               |
| GAPDH-R                   | qRT-PCR        | GGCCATCACGCCACAG                     |
| PTB-AS-F                  | qRT-PCR        | CAGAGGCAGGCCAAAACACAG                |
| PTB-AS-R                  | qRT-PCR        | GACCCAGTTTCCAGAGAGCAG                |
| PTB-F                     | qRT-PCR        | CTGCAGCAAACGGAAATGACAG               |
| PTB-R                     | qRT-PCR        | GTTTCATCTCGATGAAGGCCTGG              |
| PTB-AS Reverse Transcript | qRT-PCR        | GACCCAGTTTCCAGAGAGCAG                |
| Malat1-F                  | qRT-PCR        | CTTCCCTAGGGGATTCAGG                  |
| Malat1-R                  | qRT-PCR        | GCCCACAGGAACAAGTCCTA                 |
| PTB-AS-plenti6-F          | overexpression | GAAGATCTGCTCTTGGTCATTTCGCTCTGG       |
| PTB-AS-plenti6-R          | overexpression | CCGCTCGAGTGTGGTATTACCTTGTATGCTGTTACT |
| GSP-Reverse Transcript    | overexpression | GTGGTATTACCTTGTATGCTG                |
| PTB-3'UTR-luc-F           | Luciferase     | CCGCTCGAGctccttctccaagtccaccatc      |
| PTB-3'UTR-luc-R           | Luciferase     | GCTCTAGAGAACGGAGCGAGGATACAGAAG       |
| PTB-plenti6-F             | overexpression | CGGGATCCAtggacggcattgtcccag          |
| PTB-plenti6-R             | overexpression | CCGCTCGAGCTAGATGGTGGACTTGGAGAAGG     |

|                        |            |                                                                        |
|------------------------|------------|------------------------------------------------------------------------|
| PTB-AS-shRNA-F         | Lentivirus | CCGGCAGAAAGAGGAAGCCAGCAACGAAGCTCGAGCTTCGT<br>TGCTGGCTTCCTCTTTCTGTTTTTG |
| PTB-AS-shRNA-R         | Lentivirus | AATTCAAAAACAGAAAGAGGAAGCCAGCAACGAAGCTCGAG<br>CTTCGTTGCTGGCTTCCTCTTTCTG |
| PTB-3'UTR-RT-F         | Half-life  | GAAGTGACCTTAGCAGACCAGAG                                                |
| PTB-3'UTR-RT-R         | Half-life  | CACAAGGAAGCCAAGTCGTG                                                   |
| PTB-3'UTR-P1           | RPA        | AGAAGGAGAACGCCCTAGTG                                                   |
| PTB-3'UTR-P2           | RPA        | TCTGGAAGTTCTTGGAGCCC                                                   |
| PTB-3'UTR-P3           | RPA        | CAGGCTCAGTATTGTGACCG                                                   |
| PTB-3'UTR-P4           | RPA        | AACACAGGGCTAGACAAGGG                                                   |
| SND1-F                 | qRT-PCR    | GGTGCCCCAAGATGATGATG                                                   |
| SND1-R                 | qRT-PCR    | GGTATTCTGTGATCACTTTCTGGA                                               |
| Universe miRNAs Rltm-R | qRT-PCR    | GTGCAGGGTCCGAGGT                                                       |
| U6-RT                  | qRT-PCR    | GTCGTATCCAGTGCAGGGTCCGAGGTATTCGCACTGGATACG<br>ACAAAATATG               |
| U6-F                   | qRT-PCR    | GCGCGTCGTGAAGCGTTC                                                     |
| mir-9-RT               | qRT-PCR    | GTCGTATCCAGTGCAGGGTCCGAGGTATTCGCACTGGATACG<br>ACTCATAC                 |
| mir-9-F                | qRT-PCR    | CGGCCGTCTTTGGTTATCTAGC                                                 |
| mir-133-RT             | qRT-PCR    | GTCGTATCCAGTGCAGGGTCCGAGGTATTCGCACTGGATACG<br>ACCAGCTG                 |

mir-133-F

qRT-PCR

GCGCTTTGGTCCCCTTCAAC

PTB-AS-stealth-si1

siRNA

CUUCGUUGCUGGCUUCCUCUUUCUG

PTB-AS-stealth-si2

siRNA

UGC GGGCCAGAGCGAAUGACCAAGA

---

Supplemental Table S5: Details of candidate proteins

| Protein Symbol        | Alias                                               | Main Cell Localizations              | Function                                                        | Reference(Pubmed IDs) |
|-----------------------|-----------------------------------------------------|--------------------------------------|-----------------------------------------------------------------|-----------------------|
| <b>SND1</b>           | p100; TDRD11;<br>Tudor-SN                           | extracellular, nucleus, cytosol      | RNA binding                                                     | 22681889              |
|                       |                                                     |                                      | nucleic acid binding                                            | 7651391               |
|                       |                                                     |                                      | transcription cofactor activity                                 |                       |
|                       |                                                     |                                      | nuclease activity                                               |                       |
| <b>hnRNP U</b>        | SAFA; HNRPU;<br>U21.1; pp120;<br>EIEE54;<br>GRIP120 | cytoskeleton, nucleus, extracellular | protein binding                                                 | 20642132              |
|                       |                                                     |                                      | nucleotide binding                                              | 10490622              |
|                       |                                                     |                                      | RNA polymerase II core binding                                  |                       |
|                       |                                                     |                                      | core promoter binding                                           |                       |
| <b>SFPQ</b>           | PSF; POMP100;<br>PPP1R140                           | nucleus, extracellular               | TFIIH-class transcription factor binding                        | 10490622              |
|                       |                                                     |                                      | DNA binding                                                     | 9204873               |
|                       |                                                     |                                      | transcription regulatory region sequence-specific DNA binding   | 25765647              |
|                       |                                                     |                                      | RNA polymerase II distal enhancer sequence-specific DNA binding |                       |
| core promoter binding |                                                     |                                      |                                                                 |                       |
| nucleic acid binding  |                                                     |                                      |                                                                 |                       |
| DNA binding           |                                                     |                                      |                                                                 |                       |

|                 |                                                                                  |                                                  |                                                                                                                                                                                                                   |                                                          |
|-----------------|----------------------------------------------------------------------------------|--------------------------------------------------|-------------------------------------------------------------------------------------------------------------------------------------------------------------------------------------------------------------------|----------------------------------------------------------|
| <b>LGALS3BP</b> | 90K; M2BP;<br>gp90; CyCAP;<br>BTBD17B; MAC-<br>2-BP;<br>TANGO10B                 | extracellular, nucleus                           | scavenger receptor<br>activity                                                                                                                                                                                    |                                                          |
| <b>HDLBP</b>    | HBP; VGL;<br>PRO2900                                                             | plasma membrane, cytosol, extracellular, nucleus | RNA binding<br>protein binding<br>lipid binding<br>cadherin binding                                                                                                                                               | 22658674<br>24725430<br>1318310<br>25468996              |
| <b>PTBP1</b>    | PTB; PTB2;<br>PTB3; PTB4;<br>pPTB; HNRPI;<br>PTB-1; PTB-T;<br>HNRNPI;<br>HNRNP-I | extracellular, nucleus                           | nucleic acid binding<br>RNA binding<br>protein binding<br>poly-pyrimidine tract<br>binding<br>pre-mRNA binding                                                                                                    | 22658674<br>10653975<br>1906036<br>16260624              |
| <b>HNRNPR</b>   | HNRPR; hnRNP-<br>R                                                               | nucleus                                          | nucleic acid binding<br>RNA binding<br>mRNA 3-UTR binding<br>protein binding                                                                                                                                      | 9421497<br>16169070                                      |
| <b>DHX9</b>     | LKP; RHA;<br>DDX9; NDH2;<br>NDHI                                                 | cytoskeleton, nucleus, cytosol                   | RNA polymerase II core<br>binding<br>core promoter binding<br>regulatory region RNA<br>binding<br>RNA polymerase II<br>transcription factor<br>binding<br>RNA polymerase II<br>transcription cofactor<br>activity | 11416126<br>11038348<br>28355180<br>17303075<br>11416126 |

|                |                                                           |                                                                                          |                                               |          |
|----------------|-----------------------------------------------------------|------------------------------------------------------------------------------------------|-----------------------------------------------|----------|
| <b>CKAP4</b>   | p63; CLIMP-63;<br>ERGIC-63                                | plasma membrane, extracellular, cytoskeleton,<br>nucleus, endoplasmic reticulum, cytosol | RNA binding                                   | 22658674 |
| <b>ELAVL1</b>  | HUR; Hua;<br>MeIG; ELAV1                                  | nucleus, cytosol                                                                         | nucleic acid binding                          |          |
|                |                                                           |                                                                                          | RNA binding                                   | 19561594 |
|                |                                                           |                                                                                          | double-stranded RNA<br>binding                | 21266579 |
|                |                                                           |                                                                                          | mRNA binding                                  | 10660597 |
| <b>PABPC1</b>  | PAB1; PABP;<br>PABP1;<br>PABPC2;<br>PABPL1                | extracellular, nucleus, cytosol                                                          | mRNA 3-UTR binding                            |          |
|                |                                                           |                                                                                          | nucleic acid binding                          | 25225333 |
|                |                                                           |                                                                                          | RNA binding                                   | 16126846 |
|                |                                                           |                                                                                          | protein binding                               | 11051545 |
|                |                                                           |                                                                                          | protein C-terminus<br>binding                 | 15663938 |
| <b>RPL10</b>   | QM; L10; NOV;<br>AUTSX5;<br>DXS648;<br>MRXS35;<br>DXS648E | nucleus, cytosol                                                                         | RNA binding                                   |          |
|                |                                                           |                                                                                          | structural constituent of<br>ribosome         | 12962325 |
|                |                                                           |                                                                                          | protein binding                               | 10508860 |
|                |                                                           |                                                                                          | translation regulator<br>activity             | 26290468 |
| <b>SLC25A6</b> | ANT; AAC3;<br>ANT3; ANT 2;<br>ANT 3; ANT3Y                | extracellular, mitochondrion, nucleus                                                    | ATP:ADP antiporter<br>activity                | 2541251  |
|                |                                                           |                                                                                          | protein binding                               | 21370995 |
|                |                                                           |                                                                                          | adenine transmembrane<br>transporter activity |          |
|                |                                                           |                                                                                          | transmembrane<br>transporter activity         |          |
| <b>RPS2</b>    | S2; LLREP3                                                | extracellular, nucleus, cytosol                                                          | RNA binding                                   | 22658674 |
|                |                                                           |                                                                                          | mRNA binding                                  | 18464793 |



|               |                             |                                               |                                                                         |          |
|---------------|-----------------------------|-----------------------------------------------|-------------------------------------------------------------------------|----------|
|               |                             |                                               | structural constituent of ribosome                                      | 15883184 |
|               |                             |                                               | protein binding                                                         | 15473865 |
|               |                             |                                               | fibroblast growth factor binding                                        | 16263090 |
| <b>KHSRP</b>  | FBP2; KSRP; FUBP2           | nucleus, cytosol                              | nucleic acid binding                                                    |          |
|               |                             |                                               | DNA binding                                                             |          |
|               |                             |                                               | RNA binding                                                             | 22658674 |
|               |                             |                                               | mRNA binding                                                            |          |
|               |                             |                                               | protein binding                                                         | 16126846 |
| <b>HNRNPC</b> | C1; C2; HNRNP; HNRPC; SNRPC | extracellular, nucleus, cytosol, cytoskeleton | RNA polymerase II proximal promoter sequence-specific DNA binding       | 16217013 |
|               |                             |                                               | RNA polymerase II distal enhancer sequence-specific DNA binding         | 16217013 |
|               |                             |                                               | nucleic acid binding                                                    |          |
|               |                             |                                               | RNA binding                                                             | 9731529  |
|               |                             |                                               | mRNA 3-UTR binding                                                      | 16010978 |
| <b>RRBP1</b>  | RRp; hES; ES130; ES/130     | endoplasmic reticulum                         | RNA binding                                                             | 22681889 |
|               |                             |                                               | receptor activity                                                       | 9628588  |
| <b>HNRNPK</b> | AUKS; CSBP; TUNP; HNRPK     | extracellular, nucleus, cytoskeleton          | RNA polymerase II proximal promoter sequence-specific DNA binding       | 20371611 |
|               |                             |                                               | transcriptional activator activity, RNA polymerase II proximal promoter | 20371611 |

|                |                                                                               |                                                                |                                                  |          |
|----------------|-------------------------------------------------------------------------------|----------------------------------------------------------------|--------------------------------------------------|----------|
|                |                                                                               |                                                                | sequence-specific DNA binding                    |          |
|                |                                                                               |                                                                | nucleic acid binding                             |          |
|                |                                                                               |                                                                | DNA binding                                      |          |
|                |                                                                               |                                                                | single-stranded DNA binding                      | 20371611 |
| <b>HSP90B1</b> | ECGP; GP96;<br>TRA1; GRP94;<br>HEL35; HEL-S-125m                              | extracellular, nucleus, endoplasmic reticulum, cytosol         | RNA binding                                      | 11958450 |
|                |                                                                               |                                                                | calcium ion binding                              | 10497210 |
|                |                                                                               |                                                                | protein binding                                  | 9596688  |
|                |                                                                               |                                                                | ATP binding                                      |          |
|                |                                                                               |                                                                | protein phosphatase binding                      | 19000834 |
| <b>SLC3A2</b>  | 4F2; CD98;<br>MDU1; 4F2HC;<br>4T2HC; NACAE;<br>CD98HC                         | plasma membrane, extracellular, nucleus, cytosol               | RNA binding                                      | 22658674 |
|                |                                                                               |                                                                | double-stranded RNA binding                      | 21266579 |
|                |                                                                               |                                                                | catalytic activity                               |          |
|                |                                                                               |                                                                | calcium:sodium antiporter activity               | 10673541 |
|                |                                                                               |                                                                | protein binding                                  | 10506149 |
| <b>MYH9</b>    | MHA; FTNS;<br>EPSTS; BDPLT6;<br>DFNA17;<br>NMMHCA;<br>NMHC-II-A;<br>NMMHC-IIA | plasma membrane, extracellular, nucleus, cytosol, cytoskeleton | microfilament motor activity                     | 12237319 |
|                |                                                                               |                                                                | nucleotide binding                               |          |
|                |                                                                               |                                                                | RNA binding                                      | 22681889 |
|                |                                                                               |                                                                | motor activity                                   | 12421915 |
|                |                                                                               |                                                                | actin binding                                    | 15065866 |
| <b>COPA</b>    | AILJK; HEP-COP                                                                | extracellular, endoplasmic reticulum, cytosol, golgi apparatus | hormone activity<br>structural molecule activity |          |

|              |                                                                          |                                               |                                                                                                       |          |
|--------------|--------------------------------------------------------------------------|-----------------------------------------------|-------------------------------------------------------------------------------------------------------|----------|
| <b>RPL23</b> | L23; rpL17                                                               | extracellular, nucleus, cytosol               | transcription coactivator binding                                                                     | 19160485 |
|              |                                                                          |                                               | RNA binding                                                                                           | 22658674 |
|              |                                                                          |                                               | structural constituent of ribosome                                                                    | 12962325 |
|              |                                                                          |                                               | protein binding                                                                                       | 15314173 |
|              |                                                                          |                                               | ubiquitin protein ligase binding                                                                      | 15314173 |
| <b>HSPB1</b> | CMT2F; HMN2B; HSP27; HSP28; Hsp25; SRP27; HS.76067; HEL-S-102            | extracellular, nucleus, cytosol, cytoskeleton | RNA binding                                                                                           | 22658674 |
|              |                                                                          |                                               | protein kinase C binding                                                                              | 11003656 |
|              |                                                                          |                                               | protein binding                                                                                       |          |
|              |                                                                          |                                               | protein kinase C inhibitor activity                                                                   | 8774846  |
| <b>YBX1</b>  | YB1; BP-8; CSDB; DBPB; YB-1; CBF-A; CSDA2; EFI-A; NSEP1; NSEP-1; MDR-NF1 | extracellular, nucleus, cytosol               | RNA polymerase II proximal promoter sequence-specific DNA binding                                     | 18809583 |
|              |                                                                          |                                               | transcriptional activator activity, RNA polymerase II proximal promoter sequence-specific DNA binding | 18809583 |
|              |                                                                          |                                               | nucleic acid binding                                                                                  | 2977358  |
|              |                                                                          |                                               | DNA binding                                                                                           |          |
|              |                                                                          |                                               | chromatin binding                                                                                     |          |
| <b>RPS8</b>  | S8                                                                       | extracellular, nucleus, cytosol               | RNA binding                                                                                           | 22658674 |
|              |                                                                          |                                               | structural constituent of ribosome                                                                    |          |
|              |                                                                          |                                               | protein binding                                                                                       |          |

|                |                                              |                                 |                                                                                                       |          |
|----------------|----------------------------------------------|---------------------------------|-------------------------------------------------------------------------------------------------------|----------|
|                |                                              |                                 | RNA polymerase II proximal promoter sequence-specific DNA binding                                     | 8940189  |
| <b>FUBP3</b>   | FBP3                                         | nucleus                         | transcriptional activator activity, RNA polymerase II proximal promoter sequence-specific DNA binding | 8940189  |
|                |                                              |                                 | nucleic acid binding                                                                                  |          |
|                |                                              |                                 | DNA binding                                                                                           |          |
|                |                                              |                                 | RNA binding                                                                                           | 22658674 |
|                |                                              |                                 | fatty-acyl-CoA binding                                                                                |          |
|                |                                              |                                 | catalytic activity                                                                                    |          |
| <b>HADHA</b>   | GBP; ECHA; HADH; LCEH; MTPA; LCHAD; TP-ALPHA | extracellular, mitochondrion    | 3-hydroxyacyl-CoA dehydrogenase activity                                                              | 8135828  |
|                |                                              |                                 | acetyl-CoA C-acetyltransferase activity                                                               | 8135828  |
|                |                                              |                                 | acetyl-CoA C-acyltransferase activity                                                                 |          |
|                |                                              |                                 | RNA binding                                                                                           | 22681889 |
|                |                                              |                                 | double-stranded RNA binding                                                                           | 21266579 |
| <b>EIF2AK2</b> | PKR; PRKR; EIF2AK1; PPP1R83                  | nucleus, cytosol                | protein kinase activity                                                                               | 21123651 |
|                |                                              |                                 | protein serine/threonine kinase activity                                                              | 1695551  |
|                |                                              |                                 | eukaryotic translation initiation factor 2alpha kinase activity                                       | 25329545 |
| <b>RPS16</b>   | S16                                          | extracellular, nucleus, cytosol | RNA binding                                                                                           | 17881366 |

|                |                                                  |                                                  |                                                                                    |          |
|----------------|--------------------------------------------------|--------------------------------------------------|------------------------------------------------------------------------------------|----------|
|                |                                                  |                                                  | structural constituent of ribosome                                                 | 24725412 |
|                |                                                  |                                                  | protein binding                                                                    | 22681889 |
|                |                                                  |                                                  | RNA binding                                                                        | 12620389 |
| <b>CCT3</b>    | CCTG; PIG48;<br>TRIC5; CCT-gamma;<br>TCP-1-gamma | extracellular, nucleus, cytosol, plasma membrane | ATP binding                                                                        |          |
|                |                                                  |                                                  | protein binding involved in protein folding                                        |          |
|                |                                                  |                                                  | unfolded protein binding                                                           |          |
|                |                                                  |                                                  | RNA binding                                                                        | 22658674 |
| <b>IGF2BP3</b> | KOC; CT98;<br>IMP3; KOC1;<br>IMP-3; VICKZ3       | nucleus, cytosol                                 | mRNA 3-UTR binding                                                                 | 20080952 |
|                |                                                  |                                                  | protein binding                                                                    | 17289661 |
|                |                                                  |                                                  | translation regulator activity                                                     | 9891060  |
|                |                                                  |                                                  | mRNA 5-UTR binding                                                                 | 9891060  |
|                |                                                  |                                                  | RNA polymerase II transcription factor binding                                     | 18316612 |
| <b>MTDH</b>    | 3D3; AEG1;<br>AEG-1; LYRIC;<br>LYRIC/3D3         | plasma membrane, nucleus, endoplasmic reticulum  | transcription coactivator activity                                                 | 18316612 |
|                |                                                  |                                                  | RNA binding                                                                        | 22658674 |
|                |                                                  |                                                  | double-stranded RNA binding                                                        | 21266579 |
|                |                                                  |                                                  | protein binding                                                                    | 18316612 |
|                |                                                  |                                                  | RNA binding                                                                        | 22658674 |
| <b>RPN1</b>    | HRD2; NAS1                                       | extracellular, endoplasmic reticulum, cytosol    | contributes_to dolichyl-diphosphooligosaccharide-protein glycotransferase activity | 15835887 |
|                |                                                  |                                                  | protein binding                                                                    | 22988243 |

|               |                               |                                                  |                                                                                  |          |
|---------------|-------------------------------|--------------------------------------------------|----------------------------------------------------------------------------------|----------|
|               |                               |                                                  | transferase activity<br>transferase activity,<br>transferring glycosyl<br>groups |          |
| <b>HNRNPL</b> | HNRPL; hnRNP-<br>L; P/OKcl.14 | extracellular, nucleus                           | nucleic acid binding                                                             |          |
|               |                               |                                                  | RNA binding                                                                      | 22658674 |
|               |                               |                                                  | protein binding                                                                  | 11809897 |
|               |                               |                                                  | transcription regulatory<br>region DNA binding                                   | 11809897 |
|               |                               |                                                  | pre-mRNA intronic<br>binding                                                     | 25623890 |
| <b>GLUD1</b>  | GDH; GDH1;<br>GLUD            | mitochondrion                                    | glutamate dehydrogenase<br>(NAD+) activity                                       | 11903050 |
|               |                               |                                                  | glutamate dehydrogenase<br>[NAD(P)+] activity                                    | 11032875 |
|               |                               |                                                  | protein binding                                                                  | 16959573 |
|               |                               |                                                  | ATP binding                                                                      |          |
|               |                               |                                                  | GTP binding                                                                      | 11032875 |
| <b>FUBP1</b>  | FBP; FUBP; hDH<br>V           | nucleus                                          | DNA binding                                                                      |          |
|               |                               |                                                  | single-stranded DNA<br>binding                                                   | 8125259  |
|               |                               |                                                  | DNA binding transcription<br>factor activity                                     | 8125259  |
|               |                               |                                                  | RNA binding                                                                      | 22658674 |
| <b>ACLY</b>   | ACL; ATPCL;<br>CLATP          | extracellular, nucleus, cytosol, plasma membrane | protein binding                                                                  | 21285945 |
|               |                               |                                                  | catalytic activity                                                               |          |
|               |                               |                                                  | ATP citrate synthase<br>activity                                                 | 23932781 |
|               |                               |                                                  | protein binding                                                                  | 23932781 |
|               |                               |                                                  | ATP binding                                                                      | 1371749  |

|               |                                                                     |                                               |                                                                        |          |
|---------------|---------------------------------------------------------------------|-----------------------------------------------|------------------------------------------------------------------------|----------|
|               |                                                                     |                                               | transferase activity                                                   |          |
| <b>PRKDC</b>  | HYRC; p350;<br>DNAPK; DNP1;<br>HYRC1; IMD26;<br>XRCC7; DNA-<br>PKcs | nucleus, cytosol, extracellular               | DNA binding                                                            |          |
|               |                                                                     |                                               | double-stranded DNA<br>binding                                         | 22504299 |
|               |                                                                     |                                               | RNA binding                                                            | 22658674 |
|               |                                                                     |                                               | protein kinase activity<br>protein serine/threonine<br>kinase activity | 22504299 |
| <b>RPS18</b>  | KE3; S18;<br>HKE3; KE-3;<br>D6S218E                                 | nucleus, cytosol, extracellular               | nucleic acid binding                                                   |          |
|               |                                                                     |                                               | RNA binding                                                            | 22658674 |
|               |                                                                     |                                               | structural constituent of<br>ribosome                                  |          |
|               |                                                                     |                                               | protein binding<br>rRNA binding                                        | 22720776 |
| <b>UQCRC2</b> | QCR2; UQCR2;<br>MC3DN5                                              | extracellular, nucleus, mitochondrion         | metalloendopeptidase<br>activity                                       |          |
|               |                                                                     |                                               | protein binding                                                        | 21078624 |
|               |                                                                     |                                               | zinc ion binding                                                       |          |
|               |                                                                     |                                               | protein complex binding<br>metal ion binding                           |          |
| <b>KRT2</b>   | K2e; KRTE; CK-<br>2e; KRT2A;<br>KRT2E                               | nucleus, cytosol, extracellular, cytoskeleton | structural molecule<br>activity                                        |          |
|               |                                                                     |                                               | structural constituent of<br>cytoskeleton                              | 1380918  |
|               |                                                                     |                                               | protein binding<br>cytoskeletal protein<br>binding                     | 25416956 |
|               |                                                                     |                                               | structural constituent of<br>epidermis                                 | 7543090  |
| <b>PABPC4</b> |                                                                     | nucleus, cytosol                              | RNA binding                                                            | 22658674 |

APP1; APP-1;  
PABP4; iPABP

|                     |          |
|---------------------|----------|
| mRNA binding        |          |
| protein binding     | 11369516 |
| poly(A) binding     | 8524242  |
| poly(U) RNA binding | 8524242  |

---
